# Supplementary material for: Multimorbidity of cardiometabolic diseases: prevalence and risk for mortality from one million Chinese adults in a longitudinal cohort study
Source: PubMed Central journal article supplement — BMJ Open. 2019 Mar 3;9(3):e024476. doi: 10.1136/bmjopen-2018-024476 (PMC6443196; doi:10.1136/bmjopen-2018-024476), 2019-03-03
Supplement: bmjopen-2018-024476.draft_revisions.pdf [file bmjopen-2018-024476.draft_revisions.pdf]

# BMJ Open

BMJ Open is committed to open peer review. As part of this commitment we make the peer review history of every article we publish publicly available.

When an article is published we post the peer reviewers' comments and the authors' responses online. We also post the versions of the paper that were used during peer review. These are the versions that the peer review comments apply to.

The versions of the paper that follow are the versions that were submitted during the peer review process. They are not the versions of record or the final published versions. They should not be cited or distributed as the published version of this manuscript.

BMJ Open is an open access journal and the full, final, typeset and author-corrected version of record of the manuscript is available on our site with no access controls, subscription charges or pay-per-view fees (<http://bmjopen.bmj.com>).

If you have any questions on BMJ Open's open peer review process please email [info.bmjopen@bmj.com](mailto:info.bmjopen@bmj.com)

# BMJ Open

## Multimorbidity of cardiometabolic diseases: Prevalence and Risk of Mortality from One Million Chinese Adults in a Longitudinal Cohort Study

|                               |                                                                                                                                                                                                                                                                                                                                                                                                                                                                                                                                                                                                                                                                                                                                                                                                                                                                                                                                        |
|-------------------------------|----------------------------------------------------------------------------------------------------------------------------------------------------------------------------------------------------------------------------------------------------------------------------------------------------------------------------------------------------------------------------------------------------------------------------------------------------------------------------------------------------------------------------------------------------------------------------------------------------------------------------------------------------------------------------------------------------------------------------------------------------------------------------------------------------------------------------------------------------------------------------------------------------------------------------------------|
| Journal:                      | <i>BMJ Open</i>                                                                                                                                                                                                                                                                                                                                                                                                                                                                                                                                                                                                                                                                                                                                                                                                                                                                                                                        |
| Manuscript ID                 | bmjopen-2018-024476                                                                                                                                                                                                                                                                                                                                                                                                                                                                                                                                                                                                                                                                                                                                                                                                                                                                                                                    |
| Article Type:                 | Research                                                                                                                                                                                                                                                                                                                                                                                                                                                                                                                                                                                                                                                                                                                                                                                                                                                                                                                               |
| Date Submitted by the Author: | 28-May-2018                                                                                                                                                                                                                                                                                                                                                                                                                                                                                                                                                                                                                                                                                                                                                                                                                                                                                                                            |
| Complete List of Authors:     | Zhang, Dudan; Department of Epidemiology and Biostatistics, School of Public Health, Peking University<br>Lin, Hongbo; Yinzhou District Center for Disease Control and Prevention<br>TANG, Xun; Department of Epidemiology and Biostatistics, School of Public Health, Peking University<br>Shen, Peng; Yinzhou District Center for Disease Control and Prevention<br>Si, Yaqin; Department of Epidemiology and Biostatistics, School of Public Health, Peking University<br>Liu, Xiaofei; Department of Epidemiology and Biostatistics, School of Public Health, Peking University<br>Xu, Zhe; Department of Epidemiology and Biostatistics, School of Public Health, Peking University<br>Wu, Jinguo; Wonders Information Co., Ltd.<br>Zhang, Jingyi; Wonders Information Co., Ltd.<br>Lu, Ping; Wonders Information Co., Ltd.<br>GAO, Pei; Department of Epidemiology and Biostatistics, School of Public Health, Peking University |
| Keywords:                     | diabetes, cardiovascular disease, multimorbidity, longitudinal, Hypertension < CARDIOLOGY                                                                                                                                                                                                                                                                                                                                                                                                                                                                                                                                                                                                                                                                                                                                                                                                                                              |
|                               |                                                                                                                                                                                                                                                                                                                                                                                                                                                                                                                                                                                                                                                                                                                                                                                                                                                                                                                                        |

SCHOLARONE™  
Manuscripts

1  
2  
3 **Multimorbidity of cardiometabolic diseases: Prevalence and**  
4 **Risk of Mortality from One Million Chinese Adults in a**  
5 **Longitudinal Cohort Study**  
6  
7  
8  
9

10  
11  
12  
13  
14 Dudan Zhang, BS<sup>1</sup>; Hongbo Lin, MD<sup>2</sup>; Xun Tang, PhD, MHS<sup>1</sup>; Peng Shen, MD<sup>2</sup>; Yaqin  
15 Si, BS<sup>1</sup>; Xiaofei Liu, BS<sup>1</sup>; Zhe Xu, MS<sup>1</sup>; Jinguo Wu, BS<sup>3</sup>; Jingyi Zhang, PhD<sup>3</sup>; Ping Lu,  
16 MS<sup>3</sup>; and Pei Gao, PhD<sup>1#</sup>  
17  
18  
19  
20  
21  
22  
23

24 **Affiliation**

25  
26 <sup>1</sup> Department of Epidemiology and Biostatistics, Peking University Health Science  
27 Center, Beijing 100191, China;  
28

29  
30 <sup>2</sup> Yinzhou District Center for Disease Control and Prevention, Ningbo 315100, China.  
31

32  
33 <sup>3</sup> Wonders Information Co., Ltd., Shanghai 201112, China.  
34  
35

36 **# Correspondence:**

37 Prof. Pei Gao, PhD ([peigao@bjmu.edu.cn](mailto:peigao@bjmu.edu.cn))

38 Department of Epidemiology and Biostatistics,

39 Peking University Health Science Center,

40 38 Xueyuan Road, Beijing 100191, China  
41  
42  
43

44 Tel/Fax: +86-10-82805642  
45  
46  
47  
48  
49

50 Total word count: 3,373 words; Abstract: 251 words, 3 Tables and 3 Figures, 20

51 References, and 6 Supplemental Materials.  
52  
53  
54  
55  
56  
57

## Abstract

**Objectives:** Evolution of multimorbidity describes the continuum from healthy status, development of a single disease, and further progression to multimorbidity with additional diseases. We aim to investigate the evolution of cardiometabolic multimorbidity and their risk of mortality in a Chinese population.

**Design:** longitudinal cohort study: the CHinese Electronic health Records Research in Yinzhou (CHERRY) study during 5.43 million person-years follow-up (median 5.16 years).

**Participants:** Data from 1,038,704 adults (total 22,750 death) was analyzed.

**Exposure:** Cardiometabolic multimorbidity was defined as ever diagnosis of two or more following diseases: hypertension, diabetes and cardiovascular diseases (CVD).

**Primary and secondary outcome measures:** Age- and sex-adjusted hazard ratios (HRs) were calculated for all-cause mortality.

**Results:** Totally 105,209(10.1%) individuals changed their cardiometabolic disease status during follow-up. The prevalence of cardiometabolic multimorbidity increased from 2.41%(2.38%-2.44%) to 5.94%(5.90%-5.99%). Using baseline status of multimorbidity, the HRs were 1.37(1.33-1.42), 1.71(1.64-1.79) and 2.22(2.00-2.46) in patients with one, two or three diseases respectively. Among all combinations, patients with history of CVD only or diabetes and CVD were highest, i.e. 3.31(3.05-3.59) and 3.12(2.37-4.11) respectively, whereas patients with hypertension only had the lowest HR as 1.26(1.22, 1.30). In contrast, considering the longitudinal information, the HRs were 1.36(1.32-1.41), 2.03(1.96-2.10) and 2.16(2.05, 2.29) in patients with one, two or three diseases respectively.

**Conclusions:** The prevalence of patients having cardiometabolic comorbidity in a general population was more than doubled within 5 years, indicating rapid evolution

1  
2  
3 of cardiometabolic multimorbidity in Chinese. Among all combinations, history of  
4 CVD dominates the risk with mortality. A complementary strategy is needed in  
5  
6 China.  
7

8  
9 **Keywords:** hypertension, diabetes, cardiovascular disease, multimorbidity,  
10 longitudinal  
11  
12  
13  
14  
15  
16  
17  
18  
19  
20  
21  
22  
23  
24  
25  
26  
27  
28  
29  
30  
31  
32  
33  
34  
35  
36  
37  
38  
39  
40  
41  
42  
43  
44  
45  
46  
47  
48  
49  
50  
51  
52  
53  
54  
55  
56  
57  
58  
59  
60

For peer review only  
Confidential

## 1    **Strengths and limitations of this study**

- 2    • This study is among the first to investigate the evolution of cardiometabolic  
3    multimorbidity and their risk of mortality in a general population under  
4    real-world circumstances in China.
- 5    • We used longitudinal design with continuous surveillance on cardiometabolic  
6    disease status in a general population to provide a better understanding of the  
7    etiological association and causality in addition to using the multimorbidity  
8    assessed only at baseline.
- 9    • The Chinese Electronic health Records Research in Yinzhou (CHERRY) study is a  
10    large, natural population-based, observational cohort study linking big data of  
11    integrated individual-level electronic health records (EHRs), with published  
12    protocol on *BMJ open* 2018; 8(2): e019698.
- 13    • Although the CHERRY study has a relatively large number of participants, it is a  
14    regional cohort located in a developed area of China and as such, will not be  
15    nationally representative.
- 16    • This study has relatively short period of follow-up where long-term effect of  
17    these cardiometabolic comorbidity will be further evaluated in the future.

## 18 INTRODUCTION

19 With the considerable improvement of medical intervention and healthcare management, the  
20 aging of population has become one of the major concerns in public health worldwide.  
21 Cardiometabolic comorbidity, defined herein as the co-existence of two or more of the  
22 following cardiometabolic disorders: hypertension, diabetes mellitus, cardiovascular disease  
23 (CVD), becomes progressively more common in the world and arises attention about their  
24 impacts on public health during past several years.<sup>1-3</sup> The prevalence of each individual  
25 disease is increasing rapidly along with significant changes in economic development and  
26 lifestyle in China.<sup>4-7</sup> Though a few studies evaluated the prevalence of multimorbidity based  
27 on cross-sectional design in China,<sup>8-11</sup> they have been limited by small sample size, judged as  
28 having a high risk of bias according to Strengthening the Reporting of Observational Studies  
29 in Epidemiology (STROBE) guideline, restriction to only elder population (>60 years), or  
30 included other chronic diseases (e.g. COPD or cancer) in the definition of multimorbidity.  
31 Moreover, multimorbidity is in fact a continuum, covering the transitions from healthy status,  
32 development of a single disease, and then progression to two or more multimorbidity with  
33 the addition of further diseases.<sup>12</sup> The term of "evolution of multimorbidity" was proposed to  
34 describe this whole process, which was generally required to be evaluated from a longitudinal  
35 perspective. There were limited studies in this case. However, none of them was conducted in  
36 Chinese populations.

37  
38 On the other hand, many studies have shown that multimorbidity is associated with high risk  
39 of mortality.<sup>13-15</sup> Specifically, the Emerging Risk Factors Collaboration reported that mortality  
40 was similarly associated with a history of diabetes, stroke or MI and multiplicative mortality  
41 risk was observed for any combination of these conditions in Western population.<sup>16</sup> However,  
42 hypertension was not included in their evaluation. Time-varying exposure information to  
43 update multimorbidity status was also not available in their study. Longitudinal design with  
44 continuous surveillance on cardiometabolic disease status in a general population could  
45 provide a better understanding of the etiological association and causality in addition to using  
46 the multimorbidity assessed only at baseline.

1  
2 47  
3  
4 48 Therefore, based on the Chinese Electronic Health Records Research in Yinzhou (CHERRY)  
5  
6 49 study, which is a longitudinal cohort study and consisted of 1,038,704 adults and 22,750  
7  
8 50 deaths during 2010 through 2016, we aimed to provide reliable estimates about prevalence  
9  
10 51 of cardiometabolic comorbidities, investigate the evolution of multimorbidity during follow-up,  
11  
12 52 and assess their association with mortality in a Chinese population.  
13  
14 53

## 15 54 **METHODS**

### 16 55 **Study Design**

17  
18  
19 56 The CHERRY study is a longitudinal population-based ambispective cohort study for  
20  
21 57 cardiovascular care and outcomes research by extracting individual participant data from  
22  
23 58 regional health information system of Yinzhou, an eastern coastal area of China. Detailed  
24  
25 59 description of this big data sources and cohort profile was published previously.<sup>17</sup> Specific  
26  
27 60 data sources essential to this current study included: (1) the population census and  
28  
29 61 registered health insurance database for individuals' general demographic characteristics; (2)  
30  
31 62 health check databases including health checks from New Rural Cooperative Medical Scheme,  
32  
33 63 elder people and adults with hypertension and diabetes; (3) inpatient and outpatient  
34  
35 64 electronic medical records (EMRs); (4) disease surveillance and management database for  
36  
37 65 capturing the incidence of CVD, hypertension, diabetes where cases were required to be  
38  
39 66 reported for disease management by local general practitioners (GPs) once their diagnoses  
40  
41 67 were confirmed; (5) death certificates database where attribution of death refers to the  
42  
43 68 primary cause provided by cause-specific mortality.  
44  
45 69

46 70 All subjects were included in CHERRY study if they met all the following criteria: (1) over 18  
47  
48 71 years old on 1 January 2009; (2) have complete information on date of birth, sex, and a valid  
49  
50 72 healthcare identifier; (3) have been living in Yinzhou for at least 6 months, and (4) have  
51  
52 73 Chinese nationality. A total of 1,053,563 adults were originally enrolled in CHERRY study. In  
53  
54 74 this analysis, we choose 1 January 2010 as the date of inception to bypass the integration  
55  
56 75 and preliminary test period of the electronic health record (EHR) system and to allow for the



1  
2 76 better coverage of the regional chronic disease management services. Overall, a total of  
3  
4 77 1,038,704 participants were included in current study after excluding subjects who died in  
5  
6 78 2009 or entered the system after 2016 (**eFigure 1**). Participants is generally continuously  
7  
8 79 followed up in the health information system and imported into CHERRY study annually from  
9  
10 80 the system. Complete follow-up data were available for participants through to 31th Dec  
11  
12 81 2016. This study was approved by the Peking University Institutional Review Board  
13  
14 82 (IRB00001052-16011).

15 83

#### 17 84 **Cardiometabolic comorbidities and Outcome**

19 85 Cardiometabolic comorbidity was defined as the presence of two or more following diagnosed  
20  
21 86 disorders: hypertension, diabetes, or cardiovascular disease (CVD). We further categorized  
22  
23 87 participants into the following 8 groups: (1) hypertension, (2) diabetes, (3) CVD, (4)  
24  
25 88 hypertension and diabetes, (5) hypertension and CVD, (6) diabetes and CVD, (7)  
26  
27 89 hypertension, diabetes and CVD, and (8) none of these diseases as the reference group.  
28  
29 90 Diagnosis of these cardiometabolic diseases (and the date of diagnosis) were sought from  
30  
31 91 multiple sources: diseases management database (primary care), EMRs (hospital care), and  
32  
33 92 disease surveillance database (disease registry). Disease surveillance was considered as gold  
34  
35 93 standard for the date of diagnosis for diseases. Details of the comprehensive health care  
36  
37 94 services for chronic disease surveillance and management provided in this region was  
38  
39 95 described previously.<sup>17</sup> Besides the baseline status of individuals' cardiometabolic diseases,  
40  
41 96 longitudinal information of the exposure was also used. In this case, in order to evaluate the  
42  
43 97 mortality association with a history of hypertension, diabetes, CVD and their cardiometabolic  
44  
45 98 comorbidities, the change of cardiometabolic disease status occurred no more than 30 days  
46  
47 99 before deaths was excluded, assuming that there was a direct connection between the  
48  
49 100 change of cardiometabolic comorbidity status and mortality within the acute phase. The  
50  
51 101 primary outcome was the all-cause mortality during the follow-up. Death was confirmed by  
52  
53 102 death certificate in the health information system, which have been described previously.<sup>18</sup>  
54  
55 103 Diseases and deaths were classified according to the International Classification of Diseases,  
56  
57 104 Tenth Revision (ICD-10).

105

**106 Statistical Analysis**

107 Age- and sex- standardized prevalence and 95% CIs of cardiometabolic comorbidity at  
108 baseline and at the last visit were estimated in the overall population (and in population aged  
109 40 years or older in the supplementary analysis) based on the distribution of the 2010  
110 Chinese population census. 105,209 (10.1%) participants changed the cardiometabolic  
111 comorbidity status during follow-up. Numbers the corresponding percentages of participants  
112 who changed their cardiometabolic disease status within each 8 combination listed above  
113 were summarized. Poisson regression model adjusted to sex was used to calculate mortality  
114 rates adjusted to the age of 60 years. For the association of cardiometabolic multimorbidity  
115 with mortality, we firstly assessed the associations of the cardiometabolic comorbidity groups  
116 at baseline with risk of death from any cause. Furthermore, cardiometabolic comorbidity  
117 status was modelled as a time dependent exposure to enable updating of multimorbidity  
118 status during follow-up. The hazard ratios (HRs) were calculated using Cox proportional  
119 hazard regression models stratified by sex and adjusted for age in the primary analysis in  
120 overall population, population aged 40 years or older, and in subgroups of sex, age, location  
121 (urban / rural), status of smoking, and categories of body mass index. Finally, population  
122 attributable fractions (PAF) and 95% CI due to one, two or three cardiometabolic diseases  
123 were estimated by combining the proportional excess mortality ( $X_1$ ,  $X_2$ , and  $X_3$ , where  
124  $X=HR-1$ ) and standard error in each category with the corresponding prevalence at baseline  
125 ( $P_1$ ,  $P_2$  and  $P_3$ ).<sup>19</sup> The PAFs for one, two or  $\geq 3$  disorders are then  $P_1X_1/k$ ,  $P_2X_2/k$  and  $P_3X_3/k$ ,  
126 where  $k=1 + P_1X_1 + P_2X_2 + P_3X_3$ . PAFs were calculated based on 1) the prevalence and HRs  
127 of cardiometabolic multimorbidity at baseline; 2) the prevalence at last visit and HRs using  
128 time-variant cardiometabolic multimorbidity status. All p values were two-tailed and were not  
129 adjusted for multiple testing. We judged p values less than 0.05 significant. We used Stata  
130 (version 14.0) for all data analyses.

131

**132 RESULTS**

1  
2 133 The current cohort was established through the procedures listed in the **supplementary**  
3  
4 134 **eFigure 1**. We began with 1.28 million permanent residents in Yinzhou, China with a valid  
5  
6 135 personal identifier. After excluding subjects younger than 18 years old on or died before  
7  
8 136 January 1 2010 and subjects entered the system after December 31 2016, we included  
9  
10 137 overall 1,038,704 participants aged 18 years or older from CHERRY study in the current  
11  
12 138 analyses. The baseline characteristics of the study participants were shown in **Table 1**. The  
13  
14 139 mean (SD) age at baseline was 42.5 (14.8) and 51.4% were women. The mean (SD) of BMI  
15  
16 140 was 22.5 (2.5) kg/m<sup>2</sup>. According to Asian-specific cutoffs of BMI, 24.1% were overweight  
17  
18 141 ( $23 \leq \text{BMI} < 25$  kg/m<sup>2</sup>) and 13.9% were obese ( $\text{BMI} \geq 25$  kg/m<sup>2</sup>).  
19  
20 142

### 21 143 **Prevalence and Evolution of Cardiometabolic Comorbidity**

22  
23 144 At baseline, among total 1,038,704 subjects aged 18 years or older, 85,684 participants had  
24  
25 145 a history of one diagnosed cardiometabolic disease, 22,871 participants had a history of two  
26  
27 146 diseases, and 2,203 participants had 3 diseases respectively. The corresponding  
28  
29 147 standardized prevalence were 9.32% (95% CI: 9.26%-9.37%), 2.57% (2.54%-2.60%) and  
30  
31 148 0.26% (0.25%-0.27%) respectively (**Table 2**). The estimated prevalence for the diagnosed  
32  
33 149 cardiometabolic comorbidity was generally increased along with age and higher in women  
34  
35 150 than men (**Figure 1**). Among the population aged 40 years or older, the standardized  
36  
37 151 prevalence were 16.82% (16.72%-16.92%) for one disease, 4.69% (4.65%-4.75%) for two  
38  
39 152 diseases and 0.47% (0.45%-0.49%) for three diseases respectively (**supplementary**  
40  
41 153 **eTable 1**). In the elderly population (aged 60 years or older), the corresponding prevalence  
42  
43 154 increased to 31.90% (31.65%-32.14%), 10.41% (10.25%-10.57%) and 1.20%  
44  
45 155 (1.14%-1.26%) respectively (**supplementary eTable 2**).  
46  
47 156

48 157 A total of 105,209 out of 1,038,704 individuals (10.1%) in the study changed their  
49  
50 158 cardiometabolic comorbidity status during median 5-year follow-up (**supplementary**  
51  
52 159 **eTable 3**). The prevalence of cardiometabolic multimorbidity increased from 2.41%  
53  
54 160 (2.38%-2.44%) to 5.94% (5.90%-5.99%) (**Figure 2**). The following four conditions with  
55  
56 161 total 72,104 (68.5%) subjects lead all the transitions: 47,903 and 8,388 subjects developed

1  
2 162 hypertension or diabetes from healthy condition respectively, 9,279 patients with  
3  
4 163 hypertension and 6,534 patients with hypertension and diabetes further developed CVD.  
5  
6 164 Among 927,946 subjects without any diagnosed cardiometabolic disease at baseline, 73,302  
7  
8 165 (7.9%) developed one or more cardiometabolic diseases. 47,903 (5.2%) subjects developed  
9  
10 166 hypertension only. Among 85,684 subjects with only one disease at baseline, 24,041 (28.1%)  
11  
12 167 developed additional cardiometabolic diseases. Among all 69,406 patients with hypertension  
13  
14 168 at baseline, 12,711 (18.31%) patients had incidence of CVD during follow-up. Among all  
15  
16 169 14,127 patients with diabetes at baseline, 5,386 (38.13%) patients had incidence of CVD  
17  
18 170 during follow-up. Finally, overall 7,865 (34.39%) out of 22,871 patients with two  
19  
20 171 cardiometabolic diseases developed all three diagnosed diseases during follow-up. Patients  
21  
22 172 with all three diseases increase from 2,203 at baseline to 18,547 by the end of the study  
23  
24 173 **(supplementary eTable 3).**

25 174

### 26 175 **Association with mortality**

27  
28 176 There were total 22,750 deaths during 5.43 million person-years follow-up (median follow-up  
29  
30 177 time, 5.16 years) in the study. Overall, the sex-adjusted all-cause mortality rate at the age of  
31  
32 178 60 years was 5.68 per 1000 person-years, with 6.50 in men and 4.91 in women. In the  
33  
34 179 analysis using baseline status of cardiometabolic comorbidity, compared with the participants  
35  
36 180 without any selected disease, the age- and sex-adjusted HRs (95% CIs) for mortality was  
37  
38 181 1.37 (1.33-1.42) in those with one disease, 1.71 (1.64-1.79) in those with two diseases, and  
39  
40 182 2.22 (2.00-2.46) in those with all three diseases (**Figure 3**). Among all the combinations of  
41  
42 183 cardiometabolic comorbidity, patients with either history of CVD only or diabetes and CVD  
43  
44 184 were highest, i.e. 3.31 (3.05-3.59) and 3.12 (2.37-4.11) respectively, whereas patients with  
45  
46 185 hypertension only had lowest HR as 1.26 (1.22-1.30). HRs for cardiometabolic comorbidity  
47  
48 186 were broadly similar in men vs. women, higher in younger participants (age<40 years), and  
49  
50 187 higher in subjects living in urban areas (supplementary eTable 4). Sensitivity analysis for the  
51  
52 188 analysis using baseline status excluding the initial 1 year of follow-up was broadly similar  
53  
54 189 **(supplementary eTable 5).**

55 190

1  
2 191 In contrast, considering the longitudinal information of the cardiometabolic comorbidity,  
3  
4 192 compared with the participants without any selected disease at the last visit, the age- and  
5  
6 193 sex-adjusted HRs (95% CIs) for mortality was broadly similar as 1.36 (1.32-1.41) in those  
7  
8 194 with one disease, higher as 2.03 (1.96-2.10) in those with two diseases, and similar as 2.16  
9  
10 195 (2.05-2.29) in those with all three diseases (**Figure 3**). Though the pattern of HRs within  
11  
12 196 each combination of comorbidity were broadly similar as the analysis using baseline status,  
13  
14 197 the HR in patients with only hypertension reduced to 1.07 (1.03-1.10), whereas patients with  
15  
16 198 history of CVD increased to 4.80 (4.55-5.07). Moreover, the HR in patients with hypertension  
17  
18 199 and diabetes was attenuated to 1.30 (1.22-1.39), whereas patients with hypertension and  
19  
20 200 history of CVD increased to 2.36 (2.27-2.45).

201

### 202 **Population Attributable Fractions**

203 Using the prevalence and HRs of cardiometabolic disease status at baseline, the population  
204 attributable fractions for all-cause mortality due to one cardiometabolic disease, two diseases  
205 and three diseases were 3.30% (2.95%-3.65%), 1.73% (1.56%-1.90%) and 0.30%  
206 (0.25%-0.36%) in the overall population aged 18 years or older (**Table 3**). In people aged 40  
207 years old, PAF increased to 5.10% (4.52%-5.68%), 2.85% (2.56%-3.14%) and 0.50%  
208 (0.40%-0.59%) respectively. Using the prevalence at last visit and HRs using time-variant  
209 cardiometabolic disease status, PAFs due to one, two or three diseases were 4.17%  
210 (3.70%-4.63%), 4.36% (4.07%-4.65%) and 2.13% (1.92%-2.35%). The overall PAF  
211 increased from 5.34% (4.96%-5.72%) to 10.66% (10.11%-11.21%).

212

### 213 **DISCUSSION**

214 Our analyses of more than 1 million Chinese adults with 22,750 deaths occurred during  
215 follow-up in a longitudinal cohort has provided estimates of the prevalence of cardiometabolic  
216 comorbidity (i.e. hypertension, diabetes, and/or history of CVD) in a general population  
217 under real-world circumstances, investigate the evolution of cardiometabolic diseases in this  
218 population within 5-year of follow-up, and evaluated its association with risk of all-cause  
219 mortality. Each of our main findings has potential implications.

1  
2 220  
3

4 221 First, it was estimated that 12.2% of Chinese adults aged 18 years or older in a real-world  
5  
6 222 general population have at least one diagnosed cardiometabolic disease and nearly 3% had  
7  
8 223 cardiometabolic multimorbidity. Patients with hypertension dominates the patients with any  
9  
10 224 selected disease. The prevalence of multimorbidity at baseline increased with age, which  
11  
12 225 increased to 5.2% in the population aged 40 years or older and 11.6% in the population aged  
13  
14 226 60 years or older. Among all patients with any cardiometabolic disease, one in four had  
15  
16 227 multimorbidity. This proportion was consistent in different age populations. Moreover, during  
17  
18 228 the median of 5-year follow-up, the proportion of patients having multimorbidity was more  
19  
20 229 than doubled. Strikingly, the proportion of patients had all three diseases in the original  
21  
22 230 population were nine-fold than the baseline prevalence (0.2% to 1.8%). Nearly 60% of  
23  
24 231 patients with both hypertension and diabetes at baseline had incidence of CVD during  
25  
26 232 follow-up. Over 30% of patients having diabetes or 20% of patients with hypertension  
27  
28 233 developed cardiometabolic comorbidity. These all indicated the surprisingly fast speed of the  
29  
30 234 progression of cardiometabolic diseases.

31 235

32 236 There were limited publications on the epidemiology of multimorbidity in a general Chinese  
33  
34 237 population. Most of them included other morbidities besides cardiometabolic diseases and  
35  
36 238 only prevalence based on numbers of diseases were reported, which prevent us for the direct  
37  
38 239 comparison. It is noted that the estimated prevalence of the single diagnosed disease was  
39  
40 240 broadly consistent with those estimated from the national surveillance. For example, though  
41  
42 241 the estimation of prevalence of diabetes in China reached 10.9% in 2013, the national  
43  
44 242 prevalence of diagnosed diabetes was only 4%.<sup>4</sup> Because our population located in the  
45  
46 243 developed area of China, our estimation of 3% is considered as consistent as the prevalence  
47  
48 244 in this region is lower than the national estimation even in the traditional epidemiological  
49  
50 245 survey.

51 246

52  
53 247 Secondly, we observed about one-third increased risk in patients who had only 1 condition  
54  
55 248 that we investigated at baseline, two-thirds higher risk in patients who had a combination of

1  
2 249 any 2 diseases, and just over two-fold in patients who had all 3 conditions at baseline within  
3  
4 250 5-year of follow-up. Though these results appear to suggest that the association of  
5  
6 251 hypertension, diabetes and cardiovascular disease with mortality were additive in this  
7  
8 252 population, we found that there were significant heterogeneities within each combination of  
9  
10 253 disease conditions. Patients with only hypertension at baseline has lowest HR of 1.26 and  
11  
12 254 patients with CVD only at baseline had HR of 3.31. This pattern had been aggravated by  
13  
14 255 applying longitudinal information of the cardiometabolic disease status. Patients with only  
15  
16 256 hypertension reduced to 1.07 and patients with only CVD increased to 4.8. Within nearly  
17  
18 257 70,000 patients with hypertension at baseline, 15,000 of them developed additional  
19  
20 258 cardiometabolic diseases and therefore changed the category of disease status. In addition,  
21  
22 259 there were around 100,000 (10%) patients with hypertension at last in the study, nearly half  
23  
24 260 of them were identified during follow-up, i.e. suggested that they were newly diagnosed.  
25  
26 261 Therefore, using longitudinal information on disease status, patients with hypertension had  
27  
28 262 lower HR than those using baseline status. In contrast, there were small number of patients  
29  
30 263 (just over 2,000) at CVD only at baseline. Most of patients with history of CVD were  
31  
32 264 accompanied by either diabetes or hypertension. Around 4,000 patients developed CVD  
33  
34 265 during follow-up from healthy condition at baseline. We speculated that the increment of HR  
35  
36 266 from 3.3 using baseline status to 4.8 using longitudinal data may be partly due to the relative  
37  
38 267 short-term high risk after the first-ever CVD events. Similarly, we have also found the  
39  
40 268 increased risk for patient group with hypertension and CVD from the analysis using baseline  
41  
42 269 status to longitudinal definition of disease status.

43 270

44 271 In addition, regardless of the existence of other disease condition, history of CVD tends to  
45  
46 272 dominate the risk especially within 5 years of follow-up. Among patients with any  
47  
48 273 cardiometabolic diseases, patients with only history of CVD had highest risk, which may be  
49  
50 274 short-term effect of newly diagnosed CVD. Alternatively, it may also indicate that patients  
51  
52 275 with other cardiometabolic diseases, especially hypertension and/or diabetes, were likely to  
53  
54 276 be more aware of their health condition. Moreover, within the group of cardiometabolic  
55  
56 277 multimorbidity, only patients with hypertension and diabetes had significantly lower HR,

1  
2 278 whereas other groups, i.e. all with CVD, were broadly similar, even in patients with all three  
3  
4 279 conditions. In the results from the Emerging Risk Factor Collaboration (ERFC) of 91 cohort  
5  
6 280 studies mainly from western population, they estimated that HR for mortality was about 2 in  
7  
8 281 participants with one condition of cardiometabolic multimorbidity (type 2 diabetes, coronary  
9  
10 282 heart diseases, and stroke) and the association was multiplicative.<sup>16</sup> They didn't include  
11  
12 283 hypertension and used only baseline status of disease condition. We have seen that the  
13  
14 284 broadly similar HR was found for patients with diabetes. Higher HR was estimated in our  
15  
16 285 population for patients with CVD (stroke or MI) which may also be affected by the overall  
17  
18 286 healthcare service across countries with different economic levels. The estimated HR for  
19  
20 287 patients with CVD and diabetes (regardless of hypertension) was around 2.5, lower than the  
21  
22 288 estimation from ERFC (around 3.5-4) but consistent with the Hispanic Established Population  
23  
24 289 for the Epidemiological study of the Elderly (HR=2.4).<sup>20</sup> This may imply that the ethnic  
25  
26 290 disparity could be one of the reasons. The present study also showed that cardiometabolic  
27  
28 291 multimorbidity had more serious impact on population living in urban than in rural. It is  
29  
30 292 important to take location difference in the consideration for making strategies to improve  
31  
32 293 public health.

33 294

34 295 The strength and potential limitations of this investigation merit consideration. It is a large  
35  
36 296 and comprehensive study under real-world circumstances. Especially, we took the  
37  
38 297 longitudinal data of the cardiometabolic disease status to assess the prevalence and  
39  
40 298 evolution of cardiometabolic multimorbidity during follow-up. However, the study also has  
41  
42 299 several limitations. First, CHERRY study is based on a regional population in the developed  
43  
44 300 area of China, which is not nationally representative. Secondly, this study has relatively short  
45  
46 301 period of follow-up where long-term effect of these cardiometabolic comorbidity will be  
47  
48 302 further evaluated in the future. Thirdly, the accurate time of onset for the diseases, especially  
49  
50 303 hypertension and diabetes, were not available. We can only approximate this information by  
51  
52 304 the first diagnose time of these chronic diseases. Finally, our laboratory data sources included  
53  
54 305 the lipids measurements only in approximately 25% to 30% of the population, which prevent  
55  
56 306 us from the model adjustment of conventional lipids risk factors. However, in the results



1  
2 307 shown by ERFC, broadly similar HRs of cardiometabolic multimorbidity with mortality were  
3  
4 308 observed after further adjustment of smoking, BMI, systolic blood pressure, high-density  
5  
6 309 lipoprotein and total cholesterol, socioeconomic status and diet.  
7

8 310

9  
10 311 **Conclusions**

11 312 The prevalence of patients having cardiometabolic comorbidity in a general population was  
12  
13 313 more than doubled within 5 years, indicating rapid evolution of cardiometabolic  
14  
15 314 multimorbidity in Chinese. Among all combinations, history of CVD leads the risk with  
16  
17 315 mortality. Our findings highlight the need for a complementary strategy for primary and  
18  
19 316 secondary prevention of cardiometabolic diseases in China.  
20

21 317  
22  
23  
24  
25  
26  
27  
28  
29  
30  
31  
32  
33  
34  
35  
36  
37  
38  
39  
40  
41  
42  
43  
44  
45  
46  
47  
48  
49  
50  
51  
52  
53  
54  
55  
56  
57  
58  
59  
60

1  
2  
3 318 **Acknowledgments**

4  
5 319 The authors thank the Health and Family Planning Bureau of Yinzhou District for  
6  
7 320 providing access to the administrative databases used in the study.  
8  
9

10 321 **Authors' contributions**

11  
12 322 DZ, XT, and PG drafted the manuscript. DZ, XT, PS, and PG conceived and designed the  
13  
14 323 study. DZ, YS, and HL made substantial contributions to the study design. XT, XL, PS and  
15  
16 324 HL are responsible for study coordination; XT, PS, JW, JZ and HL are responsible for data  
17  
18 325 quality control; DZ, PL, and YS are responsible for data wrangling; XT, DZ, YS, XL, ZX and  
19  
20 326 PG are responsible for data analysis. All authors contributed to the writing of the  
21  
22 327 manuscript in an iterative manner, and have read and approved the final manuscript.  
23  
24  
25

26 328 **Funding**

27  
28 329 This study is supported by the National Natural Science Foundation of China (91546120,  
29  
30 330 81573226), and the National Thousand Talents Program for Distinguished Young  
31  
32 331 Scholars, China (QNQR201501).  
33  
34

35 332 **Competing interests**

36  
37  
38 333 None declared.  
39  
40 334

## References

1. Tinetti ME, Fried TR, Boyd CM. Designing health care for the most common chronic condition--multimorbidity. *Jama* 2012;307(23):2493-4. doi: 10.1001/jama.2012.5265 [published Online First: 2012/07/17]
2. Glynn LG. Multimorbidity: another key issue for cardiovascular medicine. *Lancet* 2009;374(9699):1421-2. doi: 10.1016/s0140-6736(09)61863-8 [published Online First: 2009/10/27]
3. Barnett K, Mercer SW, Norbury M, et al. Epidemiology of multimorbidity and implications for health care, research, and medical education: a cross-sectional study. *Lancet* 2012;380(9836):37-43. doi: 10.1016/S0140-6736(12)60240-2
4. Wang L, Gao P, Zhang M, et al. Prevalence and Ethnic Pattern of Diabetes and Prediabetes in China in 2013. *Jama* 2017;317(24):2515-23. doi: 10.1001/jama.2017.7596
5. Wang W, Jiang B, Sun H, et al. Prevalence, Incidence, and Mortality of Stroke in China: Results from a Nationwide Population-Based Survey of 480 687 Adults. *Circulation* 2017;135(8):759-71. doi: 10.1161/circulationaha.116.025250 [published Online First: 2017/01/06]
6. Chen WW, Gao RL, Liu LS, et al. China cardiovascular diseases report 2015: a summary. *Journal of geriatric cardiology : JGC* 2017;14(1):1-10. doi: 10.11909/j.issn.1671-5411.2017.01.012 [published Online First: 2017/03/09]
7. Wu Y, Benjamin EJ, MacMahon S. Prevention and Control of Cardiovascular Disease in the Rapidly Changing Economy of China. *Circulation* 2016;133(24):2545-60. doi: 10.1161/circulationaha.115.008728 [published Online First: 2016/06/15]
8. Wang SB, D'Arcy C, Yu YQ, et al. Prevalence and patterns of multimorbidity in northeastern China: a cross-sectional study. *Public Health* 2015;129(11):1539-46. doi: 10.1016/j.puhe.2015.06.013
9. Wang HH, Wang JJ, Wong SY, et al. Epidemiology of multimorbidity in China and implications for the healthcare system: cross-sectional survey among 162,464 community

- 1  
2  
3 household residents in southern China. *BMC Med* 2014;12:188. doi:  
4 10.1186/s12916-014-0188-0 [published Online First: 2014/10/24]  
5  
6 10. Hu X, Huang J, Lv Y, et al. Status of prevalence study on multimorbidity of chronic  
7 disease in China: systematic review. *Geriatr Gerontol Int* 2015;15(1):1-10. doi:  
8 10.1111/ggi.12340  
9  
10 11. Gu J, Chao J, Chen W, et al. Multimorbidity in the community-dwelling elderly in urban  
11 China. *Arch Gerontol Geriatr* 2017;68:62-67. doi: 10.1016/j.archger.2016.09.001  
12 [published Online First: 2016/09/23]  
13  
14 12. Ruel G, Levesque JF, Stocks N, et al. Understanding the evolution of multimorbidity:  
15 evidences from the North West Adelaide Health Longitudinal Study (NWAHS). *PloS one*  
16 2014;9(5):e96291. doi: 10.1371/journal.pone.0096291 [published Online First:  
17 2014/05/07]  
18  
19 13. Bragg F, Holmes MV, Iona A, et al. Association Between Diabetes and Cause-Specific  
20 Mortality in Rural and Urban Areas of China. *Jama* 2017;317(3):280-89. doi:  
21 10.1001/jama.2016.19720  
22  
23 14. Yang G, Wang Y, Zeng Y, et al. Rapid health transition in China, 1990-2010: findings  
24 from the Global Burden of Disease Study 2010. *Lancet* 2013;381(9882):1987-2015. doi:  
25 10.1016/s0140-6736(13)61097-1 [published Online First: 2013/06/12]  
26  
27 15. Lewington S, Lacey B, Clarke R, et al. The Burden of Hypertension and Associated Risk  
28 for Cardiovascular Mortality in China. *JAMA internal medicine* 2016;176(4):524-32. doi:  
29 10.1001/jamainternmed.2016.0190 [published Online First: 2016/03/15]  
30  
31 16. Emerging Risk Factors C, Di Angelantonio E, Kaptoge S, et al. Association of  
32 Cardiometabolic Multimorbidity With Mortality. *JAMA* 2015;314(1):52-60. doi:  
33 10.1001/jama.2015.7008  
34  
35 17. Lin H, Tang X, Shen P, et al. Using big data to improve cardiovascular care and outcomes  
36 in China: a protocol for the CHinese Electronic health Records Research in Yinzhou (CHERRY)  
37 Study. *BMJ Open* 2018;8(2):e019698. doi: 10.1136/bmjopen-2017-019698 [published  
38 Online First: 2018/02/15]  
39  
40  
41  
42  
43  
44  
45  
46  
47  
48  
49  
50  
51  
52  
53  
54  
55  
56  
57  
58  
59  
60

1  
2  
3 18. Wang JB, Gu MJ, Shen P, et al. Body Mass Index and Mortality: A 10-Year Prospective  
4 Study in China. Scientific reports 2016;6:31609. doi: 10.1038/srep31609 [published  
5 Online First: 2016/08/23]  
6

7  
8 19. Body-mass index and all-cause mortality: individual-participant-data meta-analysis of  
9 239 prospective studies in four continents. Lancet 2016;388(10046):776-86. doi:  
10 10.1016/s0140-6736(16)30175-1 [published Online First: 2016/07/18]  
11  
12

13  
14 20. Otiniano ME, Du XL, Ottenbacher K, et al. The effect of diabetes combined with stroke  
15 on disability, self-rated health, and mortality in older Mexican Americans: results from the  
16 Hispanic EPESE. Arch Phys Med Rehabil 2003;84(5):725-30. [published Online First:  
17 2003/05/09]  
18  
19  
20  
21  
22  
23  
24  
25  
26  
27  
28  
29  
30  
31  
32  
33  
34  
35  
36  
37  
38  
39  
40  
41  
42  
43  
44  
45  
46  
47  
48  
49  
50  
51  
52  
53  
54  
55  
56  
57  
58  
59  
60

**Table 1. Characteristics of participants at baseline.**

|                                                      | <b>Participants ≥18<br/>years</b> | <b>Participants ≥40<br/>years</b> |
|------------------------------------------------------|-----------------------------------|-----------------------------------|
| <b>No. (%) of participants</b>                       | 1,038,704                         | 545,632                           |
| <b>Age (at baseline) mean (SD)</b>                   | 42.51 (14.84)                     | 53.58 (11.63)                     |
| <b>Body mass index (kg/m<sup>2</sup>) mean (SD)</b>  | 22.48 (2.53)                      | 22.94 (2.66)                      |
| <b>BMI (kg/m<sup>2</sup> Asian-specific cutoffs)</b> |                                   |                                   |
| <23 (Normal)                                         | 562,106 (62.04)                   | 264,283 (53.65)                   |
| 23-<25 (Overweight)                                  | 218,019 (24.06)                   | 134,411 (27.29)                   |
| ≥25 (Obese)                                          | 125,862 (13.89)                   | 93,869 (19.06)                    |
| <b>Gender No. (%)</b>                                |                                   |                                   |
| Male                                                 | 504,525 (48.57)                   | 275,382 (50.47)                   |
| Female                                               | 534,179 (51.43)                   | 270,250 (49.53)                   |
| <b>Location No. (%)</b>                              |                                   |                                   |
| Urban                                                | 316,900 (30.90)                   | 168,208 (31.18)                   |
| Rural                                                | 708,642 (69.10)                   | 371,311 (68.82)                   |
| <b>Education levels No. (%)</b>                      |                                   |                                   |
| Primary school or lower                              | 249,881 (29.11)                   | 219,934 (45.78)                   |
| Middle school                                        | 547,890 (63.83)                   | 248,425 (51.71)                   |
| College or higher                                    | 60,642 (7.06)                     | 12,046 (2.51)                     |
| <b>Smoking status (Current) No. (%)</b>              |                                   |                                   |
| Never                                                | 726,241 (78.87)                   | 388,223 (77.15)                   |
| Former smoker                                        | 20,524 (2.23)                     | 17,678 (3.51)                     |
| Current smoker                                       | 174,084 (18.90)                   | 97,328 (19.34)                    |

**Table 2. Standardized prevalence of cardiometabolic disease status at baseline.**

|                       | Overall (N=1,038,704) |                  | Male (N=504,525) |                  | Female (N=534,179) |                    |
|-----------------------|-----------------------|------------------|------------------|------------------|--------------------|--------------------|
|                       | No. of cases          | % (95% CI)       | No. of cases     | % (95% CI)       | No. of cases       | % (95% CI)         |
| <b>One disease</b>    | 85,684                | 9.32 (9.26-9.37) | 40,883           | 8.64 (8.57-8.72) | 44,801             | 10.01 (9.93-10.09) |
| HT                    | 69,406                | 7.60 (7.55-7.65) | 32,697           | 6.96 (6.89-7.02) | 36,709             | 8.25 (8.18-8.33)   |
| DM                    | 14,127                | 1.49 (1.46-1.51) | 6,992            | 1.43 (1.40-1.47) | 7,135              | 1.54 (1.51-1.58)   |
| CVD                   | 2,151                 | 0.23 (0.22-0.24) | 1,194            | 0.25 (0.24-0.27) | 957                | 0.21 (0.20-0.23)   |
| <b>Two diseases</b>   | 22,871                | 2.57 (2.54-2.60) | 10,349           | 2.24 (2.20-2.29) | 12,522             | 2.90 (2.85-2.95)   |
| HT+DM                 | 11,073                | 1.26 (1.24-1.29) | 4,722            | 1.03 (1.00-1.06) | 6,351              | 1.50 (1.46-1.53)   |
| HT+CVD                | 11,540                | 1.28 (1.25-1.30) | 5,481            | 1.18 (1.15-1.21) | 6,059              | 1.38 (1.34-1.41)   |
| DM+CVD                | 258                   | 0.03 (0.02-0.03) | 146              | 0.03 (0.03-0.04) | 112                | 0.03 (0.02-0.03)   |
| <b>Three diseases</b> | 2,203                 | 0.26 (0.25-0.27) | 841              | 0.19 (0.17-0.20) | 1,362              | 0.33 (0.31-0.35)   |

HT, hypertension; DM, diabetes mellitus; CVD, cardiovascular disease.

**Table 3. Population attributable fractions for cardiometabolic multimorbidity.**

|                                                                                                            | Multimorbidity (% [95% CI]) |                     |                  | Total               |
|------------------------------------------------------------------------------------------------------------|-----------------------------|---------------------|------------------|---------------------|
|                                                                                                            | 1 disease                   | 2 diseases          | ≥3 diseases      |                     |
| <b>Using the prevalence and HRs of cardiometabolic multimorbidity at baseline</b>                          |                             |                     |                  |                     |
| Participants ≥ 18years                                                                                     | 3.30 (2.95-3.65)            | 1.73 (1.56-1.90)    | 0.30 (0.25-0.36) | 5.34 (4.96-5.72)    |
| Men                                                                                                        | 3.10 (2.65-3.54)            | 1.45 (1.24-1.65)    | 0.18 (0.12-0.24) | 4.72 (4.24-5.21)    |
| Women                                                                                                      | 3.68 (3.13-4.22)            | 2.11 (1.83-2.39)    | 0.44 (0.35-0.54) | 6.23 (5.62-6.83)    |
| Participants ≥ 40years                                                                                     | 5.10 (4.52-5.68)            | 2.85 (2.56-3.14)    | 0.50 (0.40-0.59) | 8.44 (7.82-9.07)    |
| Participants ≥ 60years                                                                                     | 6.11 (5.07-7.16)            | 4.60 (4.01-5.18)    | 0.96 (0.75-1.17) | 11.67 (10.54-12.81) |
| <b>Using the prevalence at last visit and HRs using time-variant cardiometabolic multimorbidity status</b> |                             |                     |                  |                     |
| Participants ≥ 18years                                                                                     | 4.17 (3.70-4.63)            | 4.36 (4.07-4.65)    | 2.13 (1.92-2.35) | 10.66 (10.11-11.21) |
| Men                                                                                                        | 4.19 (3.57-4.82)            | 4.14 (3.76-4.52)    | 1.69 (1.43-1.94) | 10.02 (9.30-10.75)  |
| Women                                                                                                      | 4.33 (3.62-5.05)            | 4.75 (4.30-5.20)    | 2.71 (2.35-3.07) | 11.80 (10.95-12.64) |
| Participants ≥ 40years                                                                                     | 5.92 (5.18-6.65)            | 6.95 (6.48-7.41)    | 3.49 (3.13-3.84) | 16.35 (15.52-17.18) |
| Participants ≥ 60years                                                                                     | 6.47 (5.36-7.58)            | 11.03 (10.19-11.88) | 5.75 (5.09-6.41) | 23.25 (21.98-24.53) |

HT, hypertension; DM, diabetes mellitus; CVD, cardiovascular disease.



## Figure legends

### **Figure 1. Prevalence of cardiometabolic disease according to age groups.**

Note: HT, hypertension; DM, diabetes mellitus; CVD, cardiovascular disease.

### **Figure 2. Evolution of cardiometabolic disease status during follow-up.**

Note: \*Crude prevalence; HT, hypertension; DM, diabetes mellitus; CVD, cardiovascular disease.

### **Figure 3. Age- and sex-adjusted HRs (95%) for all-cause mortality by cardiometabolic disease status.**

Note: HT, hypertension; DM, diabetes mellitus; CVD, cardiovascular disease.

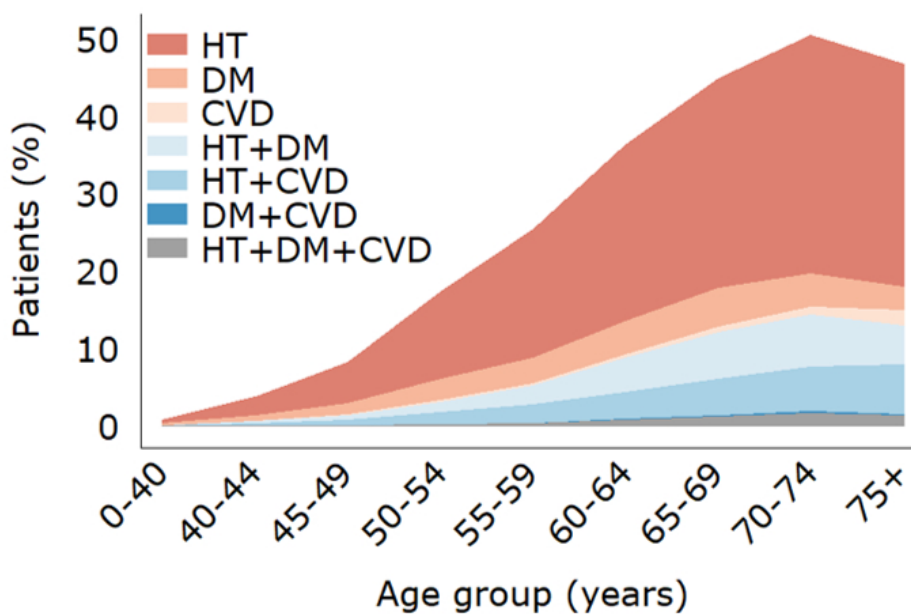

Figure 1. Prevalence of cardiometabolic disease according to age groups.

194x135mm (96 x 96 DPI)

1  
2  
3  
4  
5  
6  
7  
8  
9  
10  
11  
12  
13  
14  
15  
16  
17  
18  
19  
20  
21  
22  
23  
24  
25  
26  
27  
28  
29  
30  
31  
32  
33  
34  
35  
36  
37  
38  
39  
40  
41  
42  
43  
44  
45  
46  
47  
48  
49  
50  
51  
52  
53  
54  
55  
56  
57  
58  
59  
60

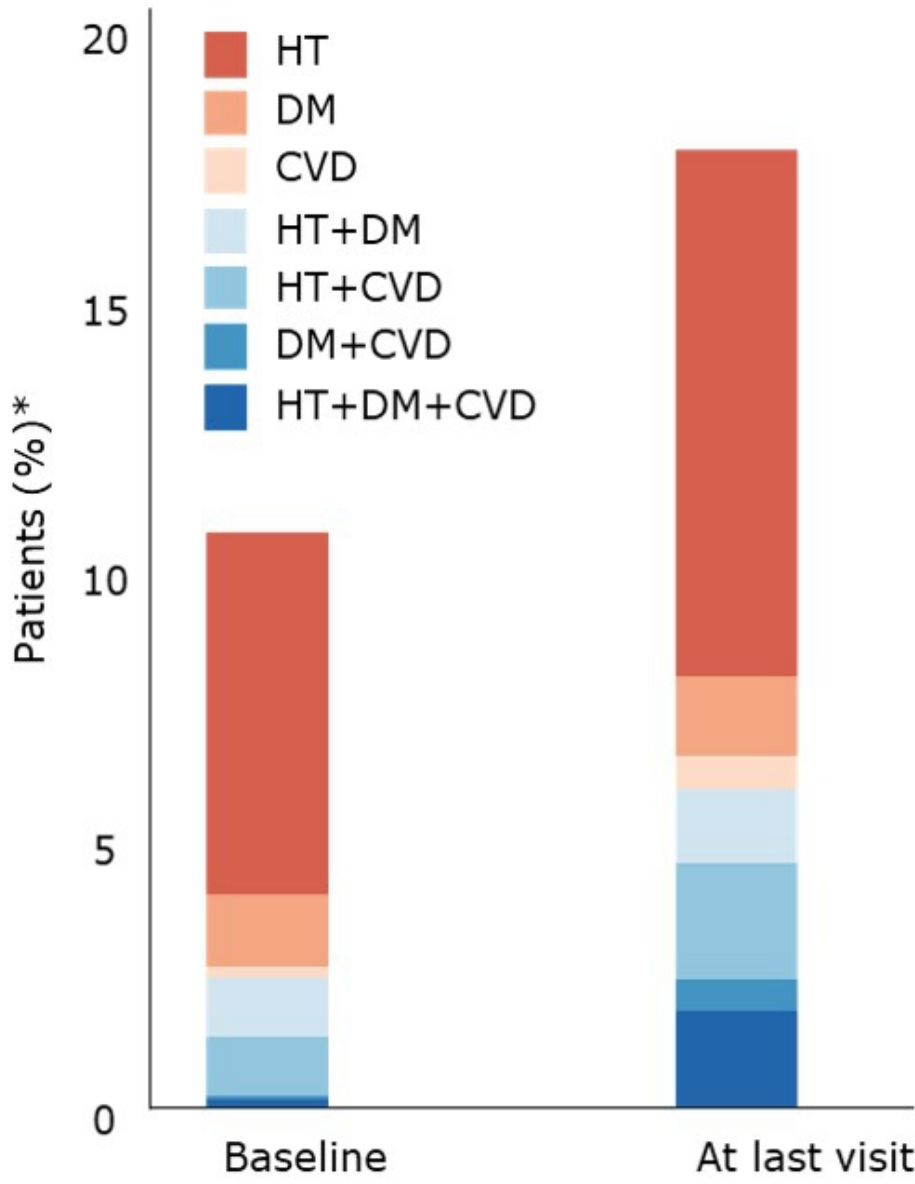

Figure 2. Evolution of cardiometabolic disease status during follow-up.

86x109mm (149 x 149 DPI)

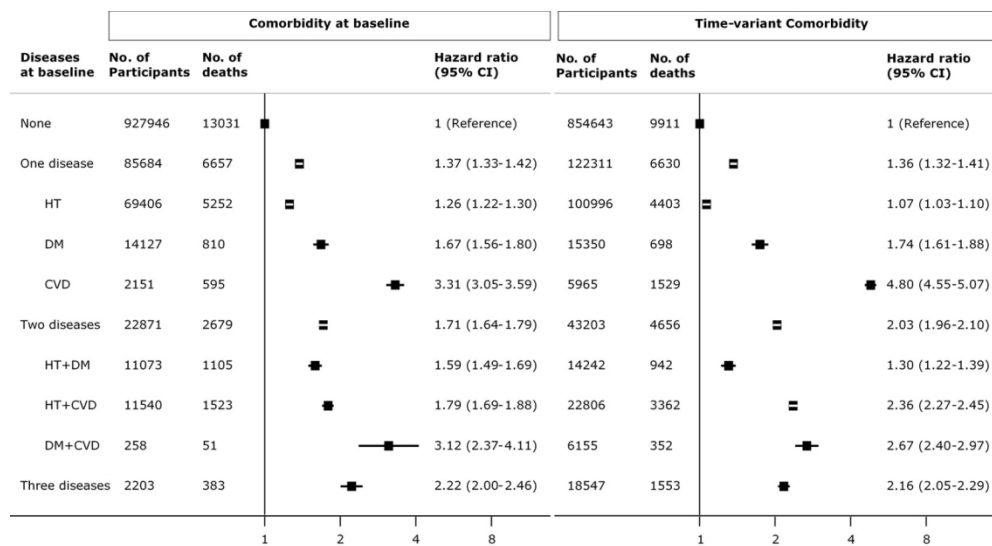

Figure 3. Age- and sex-adjusted HRs (95%) for all-cause mortality by cardiometabolic disease status.

291x169mm (143 x 143 DPI)

## Supplementary Material

### Multimorbidity of cardiometabolic diseases: Prevalence and Risk of Mortality from One Million Chinese Adults in a Longitudinal Cohort Study

|                                                                                                                                                            |   |
|------------------------------------------------------------------------------------------------------------------------------------------------------------|---|
| eFigure 1. Flow chart of inclusion of participants in CHERRY study .....                                                                                   | 2 |
| eTable 1. Standardized prevalence of cardiometabolic multimorbidity at baseline (age≥40 years).<br>3                                                       |   |
| eTable 2. Standardized prevalence of cardiometabolic multimorbidity at baseline (age≥60 years).<br>4                                                       |   |
| eTable 3. Evolution of cardiometabolic disease status during follow-up.....                                                                                | 5 |
| eTable 4. Age- and sex-adjusted HRs (95%) for all-cause mortality by cardiometabolic multimorbidity at baseline according to individuals' subgroups.....   | 7 |
| eTable 5. Age- and sex-adjusted HRs (95%) for all-cause mortality by cardiometabolic multimorbidity at baseline exclude follow-up less than one year. .... | 9 |

**eFigure 1. Flow chart of inclusion of participants in CHERRY study.**

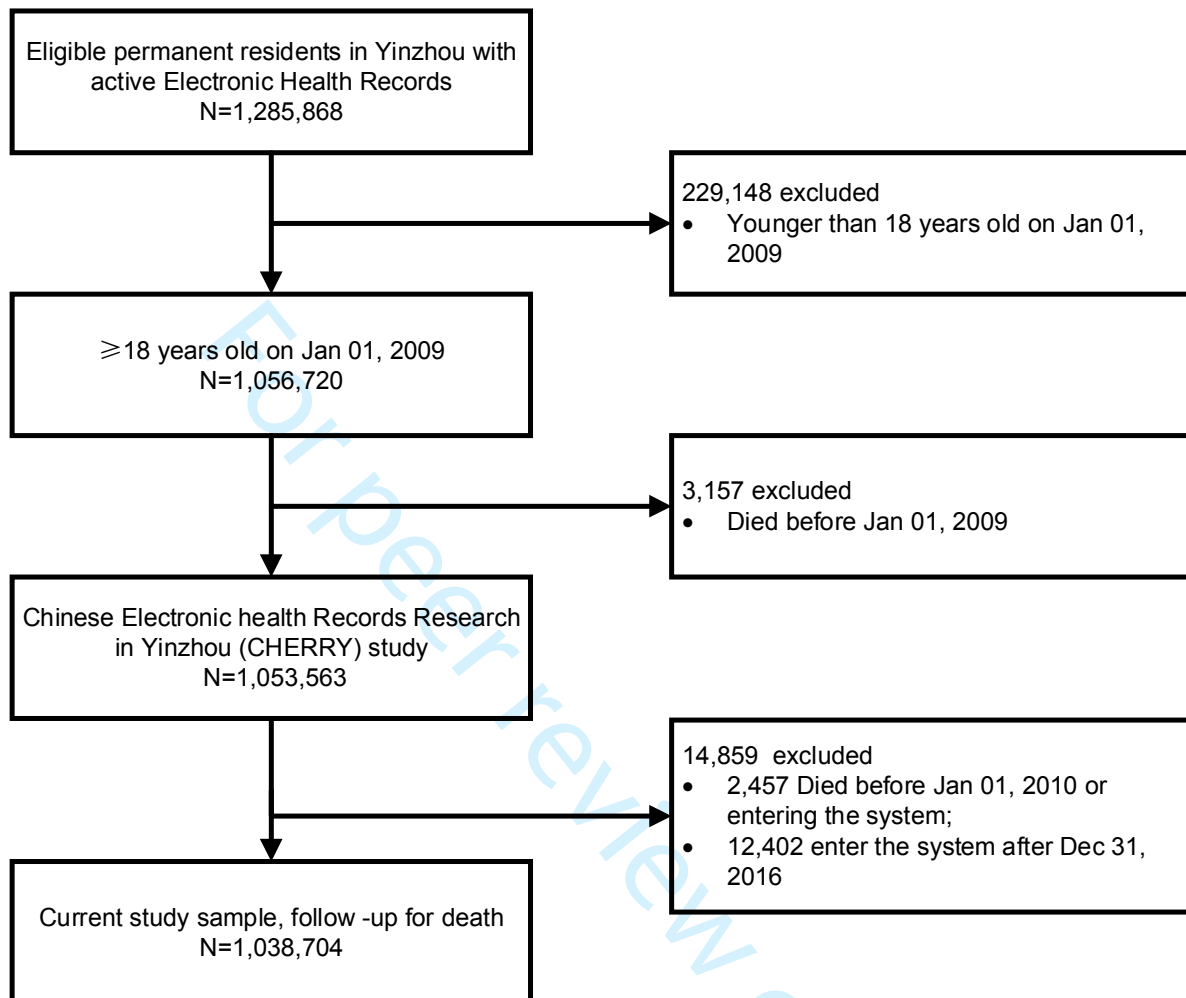

**eTable 1. Standardized prevalence of cardiometabolic multimorbidity at baseline (age≥40 years).**

|                       | Overall (N=545,632) |                     | Male (N=275,382) |                     | Female (N=270,250) |                     |
|-----------------------|---------------------|---------------------|------------------|---------------------|--------------------|---------------------|
|                       | No. of cases        | % (95% CI)          | No. of cases     | % (95% CI)          | No. of cases       | % (95% CI)          |
| <b>One disease</b>    | 82,589              | 16.82 (16.72-16.92) | 39,133           | 15.54 (15.40-15.68) | 43,456             | 18.11 (17.96-18.26) |
| HT                    | 67,505              | 13.81 (13.71-13.90) | 31,512           | 12.58 (12.46-12.71) | 35,993             | 15.05 (14.91-15.19) |
| DM                    | 13,041              | 2.59 (2.55-2.64)    | 6,481            | 2.50 (2.44-2.57)    | 6,560              | 2.68 (2.62-2.75)    |
| CVD                   | 2,043               | 0.42 (0.40-0.44)    | 1,140            | 0.45 (0.43-0.48)    | 903                | 0.38 (0.35-0.40)    |
| <b>Two diseases</b>   | 22,405              | 4.69 (4.65-4.75)    | 10,065           | 4.09 (4.01-4.16)    | 12,340             | 5.31 (5.22-5.40)    |
| HT+DM                 | 10,966              | 2.33 (2.28-2.36)    | 4,656            | 1.90 (1.85-1.96)    | 6,310              | 2.76 (2.69-2.82)    |
| HT+CVD                | 11,186              | 2.31 (2.27-2.36)    | 5,268            | 2.12 (2.07-2.18)    | 5,918              | 2.50 (2.44-2.57)    |
| DM+CVD                | 253                 | 0.05 (0.05-0.06)    | 141              | 0.06 (0.05-0.07)    | 112                | 0.05 (0.04-0.06)    |
| <b>Three diseases</b> | 2,185               | 0.47 (0.45-0.49)    | 828              | 0.34 (0.32-0.37)    | 1,357              | 0.60 (0.57-0.64)    |

HT, hypertension; DM, diabetes mellitus; CVD, cardiovascular disease.

**eTable 2. Standardized prevalence of cardiometabolic multimorbidity at baseline (age≥60 years).**

|                       | Overall (N=61,339) |                     | Male (N=28,431) |                     | Female (N=32,908) |                     |
|-----------------------|--------------------|---------------------|-----------------|---------------------|-------------------|---------------------|
|                       | No. of cases       | % (95% CI)          | No. of cases    | % (95% CI)          | No. of cases      | % (95% CI)          |
| <b>One disease</b>    | 45,083             | 31.90 (31.65-32.14) | 21,351          | 30.06 (29.72-30.40) | 23,732            | 33.66 (33.31-34.01) |
| HT                    | 37,777             | 26.77 (26.54-27.00) | 17,807          | 25.12 (24.80-25.44) | 19,970            | 28.36 (28.02-28.70) |
| DM                    | 5,833              | 4.12 (4.02-4.23)    | 2,733           | 3.84 (3.70-3.98)    | 3,100             | 4.39 (4.24-4.54)    |
| CVD                   | 1,473              | 1.00 (0.95-1.06)    | 811             | 1.10 (1.03-1.18)    | 662               | 0.91 (0.84-0.98)    |
| <b>Two diseases</b>   | 14,597             | 10.41 (10.25-10.57) | 6,448           | 9.11 (8.90-9.33)    | 8,149             | 11.65 (11.41-11.90) |
| HT+DM                 | 7,398              | 5.32 (5.20-5.44)    | 3,057           | 4.33 (4.18-4.49)    | 4,341             | 6.26 (6.08-6.45)    |
| HT+CVD                | 7,005              | 4.96 (4.84-5.07)    | 3,288           | 4.64 (4.48-4.79)    | 3,717             | 5.27 (5.10-5.44)    |
| DM+CVD                | 194                | 0.13 (0.11-0.15)    | 103             | 0.14 (0.11-0.17)    | 91                | 0.12 (0.10-0.15)    |
| <b>Three diseases</b> | 1,659              | 1.20 (1.14-1.26)    | 632             | 0.89 (0.82-0.96)    | 1,027             | 1.49 (1.40-1.58)    |

HT, hypertension; DM, diabetes mellitus; CVD, cardiovascular disease.



eTable 3. Evolution of cardiometabolic disease status during follow-up.

| Number of disorders<br>at baseline | Number of disorders at lase visit |                    |                   |                  |                  |                   |                  |                   |                  |                  | Total              |
|------------------------------------|-----------------------------------|--------------------|-------------------|------------------|------------------|-------------------|------------------|-------------------|------------------|------------------|--------------------|
|                                    | None                              | One disease        | HT                | DM               | CVD              | Two diseases      | HT+DM            | HT+CVD            | DM+CVD           | Three diseases   |                    |
| <b>None</b>                        | 854,643<br>(92.1%)                | 60,668<br>(6.5%)   | 47,903<br>(5.2%)  | 8,388<br>(0.9%)  | 4,377<br>(0.5%)  | 9,931<br>(1.1%)   | 4,322<br>(0.5%)  | 2,798<br>(0.3%)   | 2,811<br>(0.30%) | 2,704<br>(0.3%)  | 927,946<br>(89.3%) |
| <b>One disease</b>                 |                                   | 61,643<br>(71.9%)  |                   |                  |                  | 18,266<br>(21.3%) |                  |                   |                  | 5,775<br>(6.7%)  | 85,684<br>(8.2%)   |
| HT                                 |                                   |                    | 53,093<br>(76.5%) |                  |                  |                   | 3,602<br>(5.2%)  | 9,279<br>(13.4%)  |                  | 3,432<br>(4.9%)  | 69,406<br>(6.7%)   |
| DM                                 |                                   |                    |                   | 6,962<br>(49.3%) |                  |                   | 1,779<br>(12.6%) |                   | 3,121<br>(22.1%) | 2,265<br>(16.0%) | 14,127<br>(1.4%)   |
| CVD                                |                                   |                    |                   |                  | 1,588<br>(73.8%) |                   |                  | 437<br>(20.3%)    | 48<br>(2.2%)     | 78<br>(3.6%)     | 2,151<br>(0.2%)    |
| <b>Two diseases</b>                |                                   |                    |                   |                  |                  | 15,006<br>(65.6%) |                  |                   |                  | 7,865<br>(34.4%) | 22,871<br>(2.2%)   |
| HT+DM                              |                                   |                    |                   |                  |                  |                   | 4,539<br>(41.0%) |                   |                  | 6,534<br>(59.0%) | 11,073<br>(1.1%)   |
| HT+CVD                             |                                   |                    |                   |                  |                  |                   |                  | 10,292<br>(89.2%) |                  | 1,248<br>(10.8%) | 11,540<br>(1.1%)   |
| DM+CVD                             |                                   |                    |                   |                  |                  |                   |                  |                   | 175<br>(67.8%)   | 83<br>(32.2%)    | 258<br>(0.0%)      |
| <b>Three diseases</b>              |                                   |                    |                   |                  |                  |                   |                  |                   |                  | 2,203<br>(0.2%)  | 2,203<br>(0.2%)    |
| <b>Total</b>                       | 854,643<br>(82.3%)                | 122,311<br>(11.8%) | 100,996<br>(9.7%) | 15,350<br>(1.5%) | 5,965<br>(0.6%)  | 43,203<br>(4.2%)  | 14,242<br>(1.4%) | 22,806<br>(2.2%)  | 6,155<br>(0.6%)  | 18,547<br>(1.8%) | 1,038,704          |

1  
2  
3  
4  
5 HT, hypertension; DM, diabetes mellitus; CVD, cardiovascular disease.  
6  
7  
8  
9  
10  
11  
12  
13  
14  
15  
16  
17  
18  
19  
20  
21  
22  
23  
24  
25  
26  
27  
28  
29  
30  
31  
32  
33  
34  
35  
36  
37  
38  
39  
40  
41  
42  
43  
44  
45  
46  
47

For peer review only

eTable 4. Age- and sex-adjusted HRs (95%) for all-cause mortality by cardiometabolic multimorbidity at baseline according to individuals' subgroups.

| Subgroup                                  |                               | Number of disorders | n (total) | n (death) | HR (95% CI)      |   |
|-------------------------------------------|-------------------------------|---------------------|-----------|-----------|------------------|---|
| <b>Gender</b>                             | <b>Men</b>                    | 0                   | 452,452   | 7,390     | 1                |   |
|                                           |                               | 1                   | 40,883    | 3,481     | 1.38 (1.32-1.43) |   |
|                                           |                               | 2                   | 10,349    | 1,316     | 1.68 (1.58-1.78) |   |
|                                           |                               | 3                   | 841       | 155       | 2.01 (1.71-2.36) |   |
|                                           | <b>Women</b>                  | 0                   | 475,494   | 5,641     | 1                |   |
|                                           |                               | 1                   | 44,801    | 3,176     | 1.39 (1.33-1.45) |   |
|                                           |                               | 2                   | 12,522    | 1,363     | 1.78 (1.67-1.88) |   |
|                                           |                               | 3                   | 1,362     | 228       | 2.44 (2.14-2.78) |   |
| <b>Age groups</b>                         | <b>&lt;40 years</b>           | 0                   | 489,493   | 391       | 1                |   |
|                                           |                               | 1                   | 3,095     | 22        | 4.74 (3.06-7.33) |   |
|                                           |                               | ≥2                  | 484       | 2         | 1.91 (0.47-7.67) |   |
|                                           | <b>40-59 years</b>            | 0                   | 356,879   | 2,856     | 1                |   |
|                                           |                               | 1                   | 37,506    | 538       | 1.10 (1.00-1.21) |   |
|                                           |                               | 2                   | 7,808     | 157       | 1.32 (1.13-1.56) |   |
|                                           |                               | 3                   | 526       | 16        | 1.87 (1.14-3.05) |   |
|                                           | <b>≥60 years</b>              | 0                   | 81,574    | 9,784     | 1                |   |
|                                           |                               | 1                   | 45,083    | 6,097     | 1.22 (1.18-1.26) |   |
|                                           |                               | 2                   | 14,597    | 2,520     | 1.50 (1.44-1.57) |   |
|                                           |                               | 3                   | 1,659     | 367       | 1.91 (1.72-2.12) |   |
|                                           |                               |                     |           |           |                  |   |
| <b>BMI (kg/m2 Asian-specific cutoffs)</b> | <b>&lt;23 (Normal)</b>        | 0                   | 520,434   | 6,971     | 1                |   |
|                                           |                               | 1                   | 33,112    | 3,407     | 1.18 (1.13-1.23) |   |
|                                           |                               | 2                   | 7,879     | 1,223     | 1.47 (1.38-1.56) |   |
|                                           |                               | 3                   | 681       | 141       | 1.79 (1.51-2.11) |   |
|                                           | <b>23-&lt;25 (Overweight)</b> | 0                   | 187,405   | 2,617     | 1                |   |
|                                           |                               | 1                   | 23,757    | 1,490     | 0.98 (0.92-1.04) |   |
|                                           |                               | 2                   | 6,294     | 588       | 1.16 (1.06-1.27) |   |
|                                           |                               | 3                   | 563       | 94        | 1.61 (1.31-1.98) |   |
|                                           |                               |                     |           |           |                  |   |
|                                           |                               | <b>≥25 (Obese)</b>  | 0         | 89,870    | 1,430            | 1 |

|  |  |   |         |        |                  |
|--|--|---|---------|--------|------------------|
|  |  | 1 | 26,650  | 1,266  | 0.98 (0.90-1.05) |
|  |  | 2 | 8,404   | 705    | 1.32 (1.21-1.45) |
|  |  | 3 | 938     | 132    | 1.85 (1.55-2.21) |
|  |  | 0 | 707,839 | 9,588  | 1                |
|  |  | 1 | 56,869  | 4,897  | 1.10 (1.07-1.14) |
|  |  | 2 | 14,173  | 1,811  | 1.34 (1.28-1.41) |
|  |  | 3 | 1,244   | 235    | 1.71 (1.50-1.94) |
|  |  | 0 | 84,326  | 1,325  | 1                |
|  |  | 1 | 23,991  | 1,132  | 0.97 (0.90-1.05) |
|  |  | 2 | 7,459   | 612    | 1.30 (1.18-1.43) |
|  |  | 3 | 804     | 115    | 1.86 (1.53-2.25) |
|  |  | 0 | 5,544   | 105    | 1                |
|  |  | 1 | 2,659   | 134    | 1.01 (0.78-1.31) |
|  |  | 2 | 945     | 93     | 1.55 (1.17-2.06) |
|  |  | 3 | 134     | 17     | 1.79 (1.07-3.00) |
|  |  | 0 | 162,325 | 1,762  | 1                |
|  |  | 1 | 9,186   | 615    | 1.27 (1.15-1.39) |
|  |  | 2 | 2,411   | 236    | 1.50 (1.31-1.72) |
|  |  | 3 | 162     | 30     | 2.81 (1.96-4.04) |
|  |  | 0 | 650,393 | 10,132 | 1                |
|  |  | 1 | 73,932  | 5,914  | 1.16 (1.12-1.20) |
|  |  | 2 | 20,400  | 2,433  | 1.45 (1.39-1.52) |
|  |  | 3 | 2,040   | 352    | 1.83 (1.64-2.03) |
|  |  | 0 | 638,725 | 10,421 | 1                |
|  |  | 1 | 53,347  | 5,343  | 1.39 (1.35-1.44) |
|  |  | 2 | 15,043  | 2,015  | 1.57 (1.50-1.65) |
|  |  | 3 | 1,527   | 295    | 2.01 (1.79-2.25) |
|  |  | 0 | 279,407 | 2,521  | 1                |
|  |  | 1 | 29,368  | 1,267  | 1.30 (1.21-1.39) |
|  |  | 2 | 7,468   | 628    | 2.06 (1.89-2.25) |
|  |  | 3 | 657     | 84     | 2.54 (2.04-3.15) |

**eTable 5. Age- and sex-adjusted HRs (95%) for all-cause mortality by cardiometabolic multimorbidity at baseline exclude follow-up less than one year.**

| <b>Diseases at baseline</b> | <b>No. of Participants</b> | <b>No. of deaths</b> | <b>HR (95% CI)</b> |
|-----------------------------|----------------------------|----------------------|--------------------|
| <b>None</b>                 | 916,681                    | 10,941               | 1                  |
| <b>One diseases</b>         | 82,959                     | 5,945                | 1.46 (1.42-1.51)   |
| HT                          | 67,560                     | 4,767                | 1.35 (1.31-1.40)   |
| DM                          | 13,443                     | 729                  | 1.83 (1.70-1.97)   |
| CVD                         | 1,956                      | 449                  | 3.10 (2.82-3.40)   |
| <b>Two diseases</b>         | 22,393                     | 2,394                | 1.82 (1.74-1.90)   |
| HT+DM                       | 10,848                     | 1,024                | 1.75 (1.64-1.87)   |
| HT+CVD                      | 11,317                     | 1,331                | 1.85 (1.74-1.95)   |
| DM+CVD                      | 228                        | 39                   | 3.07 (2.24-4.20)   |
| <b>Three diseases</b>       | 2,142                      | 343                  | 2.36 (2.12-2.63)   |

HT, hypertension; DM, diabetes mellitus; CVD, cardiovascular disease

**STROBE 2007 (v4) Statement—Checklist of items that should be included in reports of *cohort studies***

| Section/Topic                | Item # | Recommendation                                                                                                                                                                       | Reported on page # |
|------------------------------|--------|--------------------------------------------------------------------------------------------------------------------------------------------------------------------------------------|--------------------|
| Title and abstract           | 1      | (a) Indicate the study's design with a commonly used term in the title or the abstract                                                                                               | 1, 2               |
|                              |        | (b) Provide in the abstract an informative and balanced summary of what was done and what was found                                                                                  | 2                  |
| <b>Introduction</b>          |        |                                                                                                                                                                                      |                    |
| Background/rationale         | 2      | Explain the scientific background and rationale for the investigation being reported                                                                                                 | 4-5                |
| Objectives                   | 3      | State specific objectives, including any prespecified hypotheses                                                                                                                     | 5                  |
| <b>Methods</b>               |        |                                                                                                                                                                                      |                    |
| Study design                 | 4      | Present key elements of study design early in the paper                                                                                                                              | 5-6                |
| Setting                      | 5      | Describe the setting, locations, and relevant dates, including periods of recruitment, exposure, follow-up, and data collection                                                      | 5-6                |
| Participants                 | 6      | (a) Give the eligibility criteria, and the sources and methods of selection of participants. Describe methods of follow-up                                                           | 5-6                |
|                              |        | (b) For matched studies, give matching criteria and number of exposed and unexposed                                                                                                  | Not applied        |
| Variables                    | 7      | Clearly define all outcomes, exposures, predictors, potential confounders, and effect modifiers. Give diagnostic criteria, if applicable                                             | 6                  |
| Data sources/<br>measurement | 8*     | For each variable of interest, give sources of data and details of methods of assessment (measurement). Describe comparability of assessment methods if there is more than one group | 5-6                |
| Bias                         | 9      | Describe any efforts to address potential sources of bias                                                                                                                            | 6-7                |
| Study size                   | 10     | Explain how the study size was arrived at                                                                                                                                            | 5, eFigure 1       |
| Quantitative variables       | 11     | Explain how quantitative variables were handled in the analyses. If applicable, describe which groupings were chosen and why                                                         | 6-7                |
| Statistical methods          | 12     | (a) Describe all statistical methods, including those used to control for confounding                                                                                                | 7                  |
|                              |        | (b) Describe any methods used to examine subgroups and interactions                                                                                                                  | 7                  |
|                              |        | (c) Explain how missing data were addressed                                                                                                                                          | 7                  |
|                              |        | (d) If applicable, explain how loss to follow-up was addressed                                                                                                                       | 6                  |
|                              |        | (e) Describe any sensitivity analyses                                                                                                                                                | 7                  |
| <b>Results</b>               |        |                                                                                                                                                                                      |                    |

|                          |     |                                                                                                                                                                                                              |                       |
|--------------------------|-----|--------------------------------------------------------------------------------------------------------------------------------------------------------------------------------------------------------------|-----------------------|
| Participants             | 13* | (a) Report numbers of individuals at each stage of study—eg numbers potentially eligible, examined for eligibility, confirmed eligible, included in the study, completing follow-up, and analysed            | 8, eFigure 1          |
|                          |     | (b) Give reasons for non-participation at each stage                                                                                                                                                         | eFigure 1             |
|                          |     | (c) Consider use of a flow diagram                                                                                                                                                                           | eFigure 1             |
| Descriptive data         | 14* | (a) Give characteristics of study participants (eg demographic, clinical, social) and information on exposures and potential confounders                                                                     | Table 1               |
|                          |     | (b) Indicate number of participants with missing data for each variable of interest                                                                                                                          | eFigure 1             |
|                          |     | (c) Summarise follow-up time (eg, average and total amount)                                                                                                                                                  | 9                     |
| Outcome data             | 15* | Report numbers of outcome events or summary measures over time                                                                                                                                               | 9                     |
| Main results             | 16  | (a) Give unadjusted estimates and, if applicable, confounder-adjusted estimates and their precision (eg, 95% confidence interval). Make clear which confounders were adjusted for and why they were included | Figure 3, eTable 4, 5 |
|                          |     | (b) Report category boundaries when continuous variables were categorized                                                                                                                                    | eTable 4, 5           |
|                          |     | (c) If relevant, consider translating estimates of relative risk into absolute risk for a meaningful time period                                                                                             | 9                     |
| Other analyses           | 17  | Report other analyses done—eg analyses of subgroups and interactions, and sensitivity analyses                                                                                                               | eTable 4, 5           |
| <b>Discussion</b>        |     |                                                                                                                                                                                                              |                       |
| Key results              | 18  | Summarise key results with reference to study objectives                                                                                                                                                     | 10-14                 |
| <b>Limitations</b>       |     |                                                                                                                                                                                                              |                       |
| Interpretation           | 20  | Give a cautious overall interpretation of results considering objectives, limitations, multiplicity of analyses, results from similar studies, and other relevant evidence                                   | 3, 13-14              |
| Generalisability         | 21  | Discuss the generalisability (external validity) of the study results                                                                                                                                        | 3, 13                 |
| <b>Other information</b> |     |                                                                                                                                                                                                              |                       |
| Funding                  | 22  | Give the source of funding and the role of the funders for the present study and, if applicable, for the original study on which the present article is based                                                | 15                    |

\*Give information separately for cases and controls in case-control studies and, if applicable, for exposed and unexposed groups in cohort and cross-sectional studies.

**Note:** An Explanation and Elaboration article discusses each checklist item and gives methodological background and published examples of transparent reporting. The STROBE checklist is best used in conjunction with this article (freely available on the Web sites of PLoS Medicine at <http://www.plosmedicine.org/>, Annals of Internal Medicine at <http://www.annals.org/>, and Epidemiology at <http://www.epidem.com/>). Information on the STROBE Initiative is available at [www.strobe-statement.org](http://www.strobe-statement.org).

# BMJ Open

## Multimorbidity of Cardiometabolic Diseases: Prevalence and Risk for Mortality from 1 Million Chinese Adults in a Longitudinal Cohort Study

|                                 |                                                                                                                                                                                                                                                                                                                                                                                                                                                                                                                                                                                                                                                                                                                                                                                                                                                                                                                                                                                                                                        |
|---------------------------------|----------------------------------------------------------------------------------------------------------------------------------------------------------------------------------------------------------------------------------------------------------------------------------------------------------------------------------------------------------------------------------------------------------------------------------------------------------------------------------------------------------------------------------------------------------------------------------------------------------------------------------------------------------------------------------------------------------------------------------------------------------------------------------------------------------------------------------------------------------------------------------------------------------------------------------------------------------------------------------------------------------------------------------------|
| Journal:                        | <i>BMJ Open</i>                                                                                                                                                                                                                                                                                                                                                                                                                                                                                                                                                                                                                                                                                                                                                                                                                                                                                                                                                                                                                        |
| Manuscript ID                   | bmjopen-2018-024476.R1                                                                                                                                                                                                                                                                                                                                                                                                                                                                                                                                                                                                                                                                                                                                                                                                                                                                                                                                                                                                                 |
| Article Type:                   | Research                                                                                                                                                                                                                                                                                                                                                                                                                                                                                                                                                                                                                                                                                                                                                                                                                                                                                                                                                                                                                               |
| Date Submitted by the Author:   | 23-Nov-2018                                                                                                                                                                                                                                                                                                                                                                                                                                                                                                                                                                                                                                                                                                                                                                                                                                                                                                                                                                                                                            |
| Complete List of Authors:       | Zhang, Dudan; Department of Epidemiology and Biostatistics, School of Public Health, Peking University<br>TANG, Xun; Department of Epidemiology and Biostatistics, School of Public Health, Peking University<br>Shen, Peng; Yinzhou District Center for Disease Control and Prevention<br>Si, Yaqin; Department of Epidemiology and Biostatistics, School of Public Health, Peking University<br>Liu, Xiaofei; Department of Epidemiology and Biostatistics, School of Public Health, Peking University<br>Xu, Zhe; Department of Epidemiology and Biostatistics, School of Public Health, Peking University<br>Wu, Jinguo; Wonders Information Co., Ltd.<br>Zhang, Jingyi; Wonders Information Co., Ltd.<br>Lu, Ping; Wonders Information Co., Ltd.<br>Lin, Hongbo; Yinzhou District Center for Disease Control and Prevention<br>GAO, Pei; Department of Epidemiology and Biostatistics, School of Public Health, Peking University; Key Laboratory of Molecular Cardiovascular Sciences (Peking University), Ministry of Education |
| <b>Primary Subject Heading</b>: | Epidemiology                                                                                                                                                                                                                                                                                                                                                                                                                                                                                                                                                                                                                                                                                                                                                                                                                                                                                                                                                                                                                           |
| Secondary Subject Heading:      | Epidemiology                                                                                                                                                                                                                                                                                                                                                                                                                                                                                                                                                                                                                                                                                                                                                                                                                                                                                                                                                                                                                           |
| Keywords:                       | diabetes, cardiovascular disease, multimorbidity, longitudinal, Hypertension < CARDIOLOGY                                                                                                                                                                                                                                                                                                                                                                                                                                                                                                                                                                                                                                                                                                                                                                                                                                                                                                                                              |
|                                 |                                                                                                                                                                                                                                                                                                                                                                                                                                                                                                                                                                                                                                                                                                                                                                                                                                                                                                                                                                                                                                        |

SCHOLARONE™  
Manuscripts



# Multimorbidity of Cardiometabolic Diseases: Prevalence and Risk for Mortality from 1 Million Chinese Adults in a Longitudinal Cohort Study

Dudan Zhang, MS<sup>1\*</sup>; Xun Tang, PhD, MHS<sup>1\*</sup>; Peng Shen, MD<sup>2</sup>; Yaqin Si, MS<sup>1</sup>; Xiaofei Liu, BS<sup>1</sup>; Zhe Xu, MS<sup>1</sup>; Jinguo Wu, BS<sup>3</sup>; Jingyi Zhang, PhD<sup>3</sup>; Ping Lu, MS<sup>3</sup>; Hongbo Lin, MD<sup>2</sup>; and Pei Gao, PhD<sup>1,4#</sup>

\* denotes equal contribution.

## Affiliation

<sup>1</sup> Department of Epidemiology and Biostatistics, Peking University Health Science Center, Beijing 100191, China;

<sup>2</sup> Yinzhou District Center for Disease Control and Prevention, Ningbo 315100, China.

<sup>3</sup> Wonders Information Co., Ltd., Shanghai 201112, China.

<sup>4</sup> Key Laboratory of Molecular Cardiovascular Sciences (Peking University), Ministry of Education.

## # Correspondence:

Prof. Pei Gao, PhD ([peigao@bjmu.edu.cn](mailto:peigao@bjmu.edu.cn))

Department of Epidemiology and Biostatistics,

Peking University Health Science Center,

38 Xueyuan Road, Beijing 100191, China

Tel/Fax: +86-10-82805642

Total word count: 3,699 words; Abstract: 290 words, 3 Tables and 3 Figures, 22 References, and 8 Supplemental Materials.

## Abstract

**Objectives:** The evolution of multimorbidity describes the continuum from a healthy status to development of a single disease and further progression to multimorbidity with additional diseases. We investigated the evolution of cardiometabolic multimorbidity and risk for mortality in a Chinese population.

**Design:** Longitudinal cohort study using data from the CHinese Electronic health Records Research in Yinzhou (CHERRY) study, with 5.43 million person-years follow-up (median 5.16 years).

**Participants:** Data for 1,038,704 adults (total 22,750 deaths) were analyzed.

**Exposure:** Cardiometabolic multimorbidity was defined as ever being diagnosed with two or more of three diseases: hypertension, diabetes, and cardiovascular disease (CVD).

**Primary and secondary outcome measures:** Age- and sex-adjusted hazard ratios (HRs) were calculated for all-cause mortality.

**Results:** The cardiometabolic disease status of 105,209 (10.1%) individuals changed during follow-up. The prevalence of cardiometabolic multimorbidity increased from 2.41% (95% confidence interval [CI]: 2.38%–2.44%) to 5.94% (95% CI: 5.90%–5.99%). Baseline multimorbidity status showed the HR (95% CI) was 1.37 (1.33–1.42) in those with one disease, 1.71 (1.64–1.79) in those with two diseases, and 2.22 (2.00–2.46) in those with three diseases. The highest HRs were observed for CVD only (3.31, 95% CI: 3.05–3.59) or diabetes and CVD (3.12, 95% CI: 2.37–4.11). Those with hypertension only had the lowest HR (1.26, 95% CI: 1.22–1.30). Longitudinal data showed the HRs (95% CI) in patients with one, two, and three diseases were 1.36 (1.32–1.41), 2.03 (1.96–2.10), and 2.16 (2.05–2.29), respectively.

**Conclusions:** The prevalence of cardiometabolic multimorbidity in a general Chinese population more than doubled over 5 years, indicating rapid evolution of

1  
2  
3 cardiometabolic multimorbidity. A history of CVD dominates the risk for mortality.  
4  
5 A complementary strategy for primary and secondary prevention of cardiometabolic  
6  
7 diseases is needed in China.  
8  
9

10 **Keywords:** hypertension, diabetes, cardiovascular disease, multimorbidity,  
11  
12 longitudinal  
13  
14  
15  
16  
17  
18  
19  
20  
21  
22  
23  
24  
25  
26  
27  
28  
29  
30  
31  
32  
33  
34  
35  
36  
37  
38  
39  
40  
41  
42  
43  
44  
45  
46  
47  
48  
49  
50  
51  
52  
53  
54  
55  
56  
57  
58  
59  
60

For peer review only

Confidential

## 1 **Strengths and limitations of this study**

- 2 • This study is among the first to investigate the evolution of cardiometabolic  
3 multimorbidity and risk for mortality in a general population in China.
- 4 • We used a longitudinal design with continuous surveillance of cardiometabolic  
5 disease status to provide a better understanding of etiological associations  
6 and causality, in addition to using multimorbidity assessed only at baseline.
- 7 • The Chinese Electronic health Records Research in Yinzhou (CHERRY) study is  
8 a large-scale natural population-based observational cohort study linking  
9 large data from integrated individual-level electronic health records, the  
10 study protocol of which was published in *BMJ Open* 2018; 8(2): e019698.
- 11 • The CHERRY study involves a regional cohort located in a developed area of  
12 China, and is therefore not nationally representative.
- 13 • This study had relatively short follow-up period.

## 14 INTRODUCTION

15 Considerable improvements in medical interventions and healthcare management mean  
16 population aging has become a major public health concern worldwide. Cardiometabolic  
17 multimorbidity is defined as the co-existence of two or more of three cardiometabolic  
18 disorders: hypertension, diabetes mellitus, and cardiovascular disease (CVD).  
19 Cardiometabolic multimorbidity is becoming progressively more common globally, and the  
20 public health impact has received increased attention during the past several years.<sup>1-3</sup> The  
21 individual prevalence of each disease is increasing rapidly in China, along with significant  
22 changes in economic development and lifestyles.<sup>4-7</sup> Although some studies have evaluated  
23 the prevalence of multimorbidity in China using cross-sectional designs,<sup>8-11</sup> they have been  
24 limited by factors such as: small sample sizes, high risk of bias according to the  
25 Strengthening the Reporting of Observational Studies in Epidemiology guideline, restriction  
26 to older adult populations (>60 years), or including other chronic diseases (e.g., chronic  
27 obstructive pulmonary disease or cancer) in the definition of multimorbidity. Moreover,  
28 multimorbidity is a continuum, covering the transition from healthy status to development  
29 of a single disease and then progression to two or more diseases, with the possible addition  
30 of further diseases.<sup>12</sup> The term "evolution of multimorbidity" describes this process, which  
31 is generally evaluated from a longitudinal perspective. However, there have been limited  
32 studies on this topic, and none conducted among Chinese populations.

33  
34 Multimorbidity is associated with high risk for mortality.<sup>13-15</sup> The Emerging Risk Factors  
35 Collaboration (ERFC) reported that mortality was similarly associated with a history of  
36 diabetes, stroke, or myocardial infarction (MI), and a multiplicative mortality risk was  
37 observed for any combination of these conditions in Western populations.<sup>16</sup> However,  
38 hypertension was not included in that evaluation, and time-varying exposure information to  
39 update multimorbidity status was not available. A study using a longitudinal design with  
40 continuous surveillance of cardiometabolic disease status in a general population in addition  
41 to using multimorbidity assessed at baseline may provide a better understanding of  
42 etiological associations and causality.

1  
2  
3 43  
4 44 The CHinese Electronic Health Records Research in Yinzhou (CHERRY) study is a longitudinal  
5 45 cohort study involving 1,038,704 adults (22,750 deaths) from 2010 through 2016. Using  
6 46 CHERRY data, we aimed to provide reliable estimates about the prevalence of  
7 47 cardiometabolic comorbidities, investigate the evolution of multimorbidity during follow-up,  
8 48 and assess the association with mortality in a Chinese population.  
9  
10  
11  
12  
13  
14  
15  
16

## 17 50 **METHODS**

### 18 51 **Study design**

19 52 The CHERRY study is a longitudinal population-based ambispective cohort study focused on  
20 53 cardiovascular care and outcomes research. Individual participant data were extracted from  
21 54 the regional health information system in Yinzhou, an eastern coastal area of China. A  
22 55 detailed description of the data sources and cohort profile was published previously.<sup>17</sup>  
23 56 Specific data sources essential to the present study included: 1) the population census and  
24 57 registered health insurance database for individuals' general demographic characteristics;  
25 58 2) health check databases, including health checks from the New Rural Cooperative Medical  
26 59 Scheme, older adults, and adults with hypertension and diabetes; 3) inpatient and  
27 60 outpatient electronic medical records (EMRs); 4) disease surveillance and management  
28 61 database that captured the incidence of CVD, hypertension, and diabetes (where cases were  
29 62 required to be reported for disease management by local general practitioners on  
30 63 confirmation of diagnosis); and 5) death certificates database where attribution of death  
31 64 refers to the primary cause provided by cause-specific mortality.  
32  
33  
34  
35  
36  
37  
38  
39  
40  
41  
42  
43  
44  
45  
46  
47  
48

49 66 Individuals were included in the CHERRY study if they met all inclusion criteria: 1) aged  $\geq 18$   
50 67 years on 1 January 2009; 2) had complete information on date of birth, sex, and a valid  
51 68 healthcare identifier; 3) had been living in Yinzhou for at least 6 months; and 4) had Chinese  
52 69 nationality. In total, 1,053,563 adults were originally enrolled in the CHERRY study. In this  
53 70 analysis, we choose 1 January 2010 as the date of inception to bypass the integration and  
54 71 preliminary test period of the EMR system and allow for better coverage of regional chronic  
55  
56  
57  
58  
59  
60

1  
2  
3 72 disease management services. After excluding those who died in 2009 or entered the system  
4  
5 73 after 2016, we included 1,038,704 participants in this study (**Supplementary eFigure 1**).  
6  
7 74 Follow-up in the health information system is generally continuous. CHERRY updates  
8  
9 75 information for all cohort members annually from the health information system databases.  
10  
11 76 Complete follow-up data were available for participants through to December 31, 2016. This  
12  
13 77 study was approved by the Peking University Institutional Review Board (IRB00001052-  
14  
15 78 16011).

16  
17 79

### 18 80 **Cardiometabolic multimorbidities and outcomes**

19  
20 81 Cardiometabolic multimorbidity was defined as the presence of two or more of three  
21  
22 82 diagnosed disorders: hypertension, diabetes, or CVD [including coronary heart disease (CHD)  
23  
24 83 and cerebrovascular diseases]. We categorized participants into eight groups: 1)  
25  
26 84 hypertension, 2) diabetes, 3) CVD, 4) hypertension and diabetes, 5) hypertension and CVD,  
27  
28 85 6) diabetes and CVD, 7) hypertension, diabetes, and CVD, and 8) none of these diseases  
29  
30 86 (reference group). Diagnosis of these cardiometabolic diseases (and date of diagnosis) were  
31  
32 87 obtained from multiple sources: diseases management database (primary care), EMRs  
33  
34 88 (hospital care), and disease surveillance database (disease registry). Date in disease  
35  
36 89 surveillance was considered the gold standard for the date of diagnosis. Details of the  
37  
38 90 comprehensive healthcare services for chronic disease surveillance and management  
39  
40 91 provided in the study region were described previously.<sup>17</sup> In addition to individuals' baseline  
41  
42 92 cardiometabolic disease status, longitudinal information for the exposure was also used. To  
43  
44 93 evaluate the association between mortality and a history of hypertension, diabetes, CVD,  
45  
46 94 and their cardiometabolic multimorbidities, changes in cardiometabolic disease status that  
47  
48 95 occurred  $\leq 30$  days before death were excluded, assuming that there was a direct connection  
49  
50 96 between the change of cardiometabolic multimorbidity status and mortality within the acute  
51  
52 97 phase. The primary outcome was all-cause mortality during follow-up. Death was confirmed  
53  
54 98 by the death certificate in the health information system, as previously described.<sup>18</sup> Diseases  
55  
56 99 and deaths were classified according to the International Classification of Diseases, Tenth  
57  
58 100 Revision (ICD-10).

1  
2  
3 101  
4  
5 102 **Statistical analysis**  
6  
7 103 Continuous and categorical baseline characteristics of participants were summarized by  
8  
9 104 mean [standard deviation (SD)] or numbers (percentage) respectively. Cardiometabolic  
10  
11 105 multimorbidities were classified as 8 combinations listed above. Numbers (and  
12  
13 106 corresponding percentages) of participants who changed their cardiometabolic disease  
14  
15 107 status during follow-up were summarized. Age- and sex- standardized prevalence and 95%  
16  
17 108 confidence intervals (CI) for cardiometabolic multimorbidity at baseline and at the last visit  
18  
19 109 were estimated for the overall population (and the population aged  $\geq 40$  years in a  
20  
21 110 supplementary analysis) based on the distribution of the 2010 Chinese population census.  
22  
23 111 A Poisson regression model adjusted for sex was used to calculate mortality rates, adjusted  
24  
25 112 for age 60 years. To investigate the association between cardiometabolic multimorbidity and  
26  
27 113 mortality, we first assessed the associations between the cardiometabolic multimorbidity  
28  
29 114 groups at baseline and risk for death from any cause. Furthermore, cardiometabolic  
30  
31 115 multimorbidity status was modeled as a time dependent exposure to enable updating of  
32  
33 116 multimorbidity status during follow-up. Hazard ratios (HRs) and 95% CIs were calculated  
34  
35 117 using Cox proportional hazard regression models stratified by sex and adjusted for age in  
36  
37 118 the primary analyses of the overall population, the population aged  $\geq 40$  years, and  
38  
39 119 subgroups (sex, age, location [urban/rural], smoking status, and body mass index [BMI]  
40  
41 120 category). To explore the extent to which conventional factors (BMI, smoking, education  
42  
43 121 level, and location) explained the associations between cardiometabolic multimorbidity and  
44  
45 122 mortality, HRs adjusted for these additional factors were calculated for people with full  
46  
47 123 information on these factors. Finally, population attributable fractions (PAF) and 95% CI due  
48  
49 124 to one, two or three cardiometabolic diseases were estimated by combining the proportional  
50  
51 125 excess mortality ( $X_1$ ,  $X_2$ , and  $X_3$ ; where  $X=HR-1$ ) and standard error in each category with  
52  
53 126 the corresponding prevalence at baseline ( $P_1$ ,  $P_2$ , and  $P_3$ ).<sup>19</sup> The PAFs for one, two, or three  
54  
55 127 disorders are  $P_1X_1/k$ ,  $P_2X_2/k$ , and  $P_3X_3/k$ ; where  $k=1 + P_1X_1 + P_2X_2 + P_3X_3$ . PAFs were  
56  
57 128 calculated based on: 1) the prevalence and HRs of cardiometabolic multimorbidity at  
58  
59 129 baseline; and 2) the prevalence at last visit and HRs using time-variant cardiometabolic



1  
2  
3 130 multimorbidity status. All p-values were two-tailed and not adjusted for multiple testing. We  
4  
5 131 used Stata (version 14.0) for all data analyses, with a statistical significance level of  $P <$   
6  
7 132 0.05.

8  
9 133

### 10 134 **Patient and public involvement**

11  
12 135 Patients were not involved in the development of the research question or measures, or the  
13  
14 136 design, recruitment, or conduct of this study. The results of this study will be disseminated  
15  
16 137 to study participants and the public via this publication and the CHERRY study website  
17  
18 138 (<http://www.cherry-study.org>).

19  
20  
21 139

### 22 140 **RESULTS**

23  
24 141 The present cohort was established using the procedures listed in **Supplementary eFigure**  
25  
26 142 **1**. We began with 1.28 million permanent residents in Yinzhou, China with a valid personal  
27  
28 143 identifier. After excluding subjects younger than 18 years old as at January 1, 2010, those  
29  
30 144 that died before that date, and those entered into the system after December 31, 2016, the  
31  
32 145 present analyses included 1,038,704 CHERRY study participants aged  $\geq 18$  years. **Table 1**  
33  
34 146 shows participants' baseline characteristics. Among all participants, 1,025,542 (98.7%) had  
35  
36 147 information on living location, 858,413 (82.6%) had information on education level, 905,987  
37  
38 148 (87.2%) had at least one BMI measurement, and 905,987 (88.7%) had at least one smoking  
39  
40 149 status measurement. The mean $\pm$ SD age at baseline was  $42.5\pm 14.8$  years (51.4% women).  
41  
42 150 The mean BMI was  $22.5\pm 2.5$  kg/m<sup>2</sup>. According to Asian-specific BMI cutoffs, 24.1% were  
43  
44 151 overweight (23–25 kg/m<sup>2</sup>) and 13.9% were obese (BMI  $\geq 25$  kg/m<sup>2</sup>). At the last visit during  
45  
46 152 follow-up, the mean BMI was  $22.5\pm 2.6$  kg/m<sup>2</sup>; 23.9% were overweight and 14.8% were  
47  
48 153 obese. From baseline to the last visit, the proportion of former smokers changed from 2.2%  
49  
50 154 to 2.4% and the proportion of current smokers changed from 18.9% to 20.0%.

51  
52  
53 155

### 54 156 **Prevalence and evolution of cardiometabolic multimorbidity**

55  
56 157 At baseline, 85,684 participants had one diagnosed cardiometabolic disease, 22,871 had  
57  
58 158 two diseases, and 2,203 had three diseases. The standardized prevalence were 9.32% (95%  
59  
60

1  
2  
3 159 CI: 9.26%–9.37%) for one disease, 2.57% (95% CI: 2.54%–2.60%) for two diseases, and  
4  
5 160 0.26% (95% CI: 0.25%–0.27%) for three diseases (**Table 2**). The estimated prevalence of  
6  
7 161 diagnosed cardiometabolic multimorbidity increased with age and was higher in women than  
8  
9 162 men (**Figure 1**). Among the population aged  $\geq 40$  years, the standardized prevalence rates  
10  
11 163 were 16.82% (95% CI: 16.72%–16.92%) for one disease, 4.69% (95% CI: 4.65%–4.75%)  
12  
13 164 for two diseases, and 0.47% (95% CI: 0.45%–0.49%) for three diseases (**Supplementary**  
14  
15 165 **eTable 1**). In the population aged  $\geq 60$  years, the prevalence rates increased to 31.90%  
16  
17 166 (95% CI: 31.65%–32.14%), 10.41% (95% CI: 10.25%–10.57%), and 1.20% (95% CI:  
18  
19 167 1.14%–1.26%) for one, two, and three diseases, respectively (**Supplementary eTable 2**).  
20  
21 168  
22  
23 169 In total, 105,209 participants (10.1%) changed their cardiometabolic multimorbidity status  
24  
25 170 during the (median) 5-year follow-up (**Supplementary eTable 3**). Regarding the history  
26  
27 171 of CVD, 50,458 (94.4%) of all 53,473 patients have information on type of CVD. Within  
28  
29 172 these patients, 26,282 had CHD, 23,538 had cerebrovascular diseases and 638 had both  
30  
31 173 CHD and cerebrovascular diseases respectively. The crude prevalence of cardiometabolic  
32  
33 174 multimorbidity increased from 2.41% (95% CI: 2.38%–2.44%) to 5.94% (95% CI: 5.90%–  
34  
35 175 5.99%) (**Figure 2 & Supplementary eTable 3**). Four disease groups (72,104 participants;  
36  
37 176 68.5%) lead all transitions during follow-up: 47,903 healthy subjects developed  
38  
39 177 hypertension only; 8,388 healthy subjects developed diabetes only; 9,279 patients with  
40  
41 178 hypertension developed CVD; and 6,534 patients with hypertension and diabetes developed  
42  
43 179 CVD. Among 927,946 participants without any diagnosed cardiometabolic disease at  
44  
45 180 baseline, 73,302 (7.9%) developed one or more cardiometabolic diseases, of which 47,903  
46  
47 181 (5.2%) developed hypertension only. Among 85,684 participants with one disease at  
48  
49 182 baseline, 24,041 (28.1%) developed additional diseases. Of 69,406 participants with  
50  
51 183 hypertension at baseline, 12,711 (18.31%) had an incidence of CVD during follow-up. Of  
52  
53 184 14,127 participants with diabetes at baseline, 5,386 (38.13%) had an incidence of CVD  
54  
55 185 during follow-up. Finally, 7,865 (34.39%) of 22,871 participants with two diseases  
56  
57 186 developed all three diseases during follow-up. The number of participants with all three  
58  
59  
60

187 diseases increased from 2,203 at baseline to 18,547 by the end of the study  
188 **(Supplementary eTable 3).**

189

### 190 **Associations with mortality**

191 There were 22,750 deaths during the 5.43 million person-years of follow-up (median follow-  
192 up time, 5.16 years). The sex-adjusted all-cause mortality rate at age 60 years was 5.68  
193 per 1000 person-years (6.50 in men, 4.91 in women). In the analysis using baseline  
194 cardiometabolic multimorbidity status, the age- and sex-adjusted HRs for mortality were  
195 1.37 (95% CI: 1.33–1.42) for one disease, 1.71 (95% CI: 1.64–1.79) for two diseases, and  
196 2.22 (95% CI: 2.00–2.46) for three diseases, compared with participants without any  
197 disease **(Figure 3)**. The highest HRs were observed in patients with either a history of CVD  
198 only (3.31, 95% CI: 3.05–3.59) or diabetes and CVD (3.12, 95% CI: 2.37–4.11). Patients  
199 with hypertension only had lowest HR (1.26, 95% CI: 1.22–1.30). HRs for cardiometabolic  
200 multimorbidity were broadly similar in men and women, higher in younger participants (aged  
201 <40 years), and higher in those living in urban areas **(Supplementary eTable 4)**. The  
202 sensitivity analysis for the analysis using baseline status excluding the initial 1 year of follow-  
203 up was broadly similar **(Supplementary eTable 5)**.

204

205 The longitudinal data for cardiometabolic multimorbidity showed the age- and sex-adjusted  
206 HRs for mortality were broadly similar in those with one disease (1.36, 95% CI 1.32–1.41),  
207 higher in those with two diseases (2.03, 95% CI 1.96–2.10), and similar in those with all  
208 three diseases (2.16, 95% CI 2.05–2.29) compared with participants without any disease  
209 at the last visit **(Figure 3)**. Although the pattern of HRs within each multimorbidity  
210 combination were broadly similar to the analysis using baseline status, the HR in participants  
211 with hypertension only reduced to 1.07 (95% CI 1.03–1.10), whereas that for those with  
212 history of CVD increased to 4.80 (95% CI 4.55–5.07). The HR in those with hypertension  
213 and diabetes was attenuated to 1.30 (95% CI 1.22–1.39), whereas that for participants with  
214 hypertension and CVD increased to 2.36 (95% CI 2.27–2.45). Broadly similar association  
215 were observed among the 788,703 participants with full information on additional risk

216 factors (BMI, smoking, education level and location) after further adjustment for those  
217 factors (**Supplementary eTable 6**).

218

### 219 **PAFs**

220 Using the prevalence and HRs for cardiometabolic disease status at baseline, the PAFs for  
221 all-cause mortality in the overall population aged  $\geq 18$  years due to one, two, and three  
222 cardiometabolic diseases were 3.30% (95% CI: 2.95%–3.65%), 1.73% (95% CI: 1.56%–  
223 1.90%), and 0.30% (95% CI: 0.25%–0.36%), respectively (**Table 3**). In people aged  $\geq 40$   
224 years, the PAF increased to 5.10% (95% CI: 4.52%–5.68%) for one disease, 2.85% (95%  
225 CI: 2.56%–3.14%) for two diseases, and 0.50% (95% CI: 0.40%–0.59%) for three diseases.  
226 Using the prevalence at last visit and HRs for time-variant cardiometabolic disease status,  
227 PAFs were 4.17% (95% CI: 3.70%–4.63%) for one disease, 4.36% (95% CI: 4.07%–4.65%)  
228 for two diseases, and 2.13% (95% CI: 1.92%–2.35%) for three diseases. The overall PAF  
229 increased from 5.34% (95% CI: 4.96%–5.72%) to 10.66% (95% CI: 10.11%–11.21%).

230

### 231 **DISCUSSION**

232 Our analyses of more than 1 million Chinese adults (22,750 deaths during follow-up) in a  
233 longitudinal cohort provided estimates of the prevalence of cardiometabolic multimorbidity  
234 (hypertension, diabetes, and CVD) in a general population under real-world circumstances.  
235 This study also described the evolution of cardiometabolic diseases in this population over 5  
236 years and evaluated associations with risk for all-cause mortality. Each of our main findings  
237 has potential implications.

238

239 First, 12.2% of Chinese adults aged  $\geq 18$  years in a real-world general population had at  
240 least one diagnosed cardiometabolic disease, and nearly 3% had cardiometabolic  
241 multimorbidity. Hypertension was the dominant diagnosis in the group with one disease.  
242 The prevalence of multimorbidity at baseline increased with age, and was 5.2% in the  
243 population aged  $\geq 40$  years and 11.6% in the population aged  $\geq 60$ . One in four patients with  
244 any cardiometabolic disease had multimorbidity. This proportion was consistent in different

1  
2  
3 245 age groups. Moreover, the proportion of patients with multimorbidity more than doubled  
4  
5 246 during the (median) 5-year follow-up. The proportion of patients with all three diseases  
6  
7 247 increased to nine-fold the baseline prevalence (0.2% to 1.8%). Nearly 60% of patients with  
8  
9 248 both hypertension and diabetes at baseline had an incidence of CVD during follow-up. Over  
10  
11 249 30% of patients with diabetes and 20% of patients with hypertension developed  
12  
13 250 cardiometabolic multimorbidity. These findings highlighted the rapid progression of  
14  
15 251 cardiometabolic diseases.

16  
17 252  
18  
19 253 Limited publications are available on the epidemiology of multimorbidity in a general Chinese  
20  
21 254 population. A systematic review of nine published studies in China reported the prevalence  
22  
23 255 of multimorbidity among those aged  $\geq 60$  years ranged from 6.4% (95% CI: 5.1–8.0) to  
24  
25 256 76.5% (95% CI: 73.6–79.2).<sup>10</sup> However, most of the included studies considered morbidities  
26  
27 257 in addition to cardiometabolic diseases and only reported prevalence based on number of  
28  
29 258 diseases, which prevented us making direct comparisons. The estimated prevalence of single  
30  
31 259 diagnosed diseases in our study was broadly consistent with estimates from national  
32  
33 260 surveillance. For example, although the estimate of the prevalence of diabetes in China  
34  
35 261 reached 10.9% in 2013, the national prevalence of diagnosed diabetes was only 4%.<sup>4</sup>  
36  
37 262 Because our population was located in a developed area of China, our estimate of 3% is  
38  
39 263 consistent with expectations, as the prevalence in this region is lower than the national  
40  
41 264 estimate, even in traditional epidemiological surveys. Compared with developed countries,  
42  
43 265 about 0.52% of participants aged  $\geq 40$  years (mean age  $53.6 \pm 11.6$  years) in our cohort had  
44  
45 266 multimorbidity of diabetes and CVD (regardless of hypertension,  $0.47\% + 0.05\% = 0.52\%$ ,  
46  
47 267 **eTable 1**), which was similar as 0.7% reported in the UK Biobank (mean age  $56.7 \pm 8.1$   
48  
49 268 years).<sup>16</sup> About 1.3% of participants aged  $\geq 60$  years in our cohort had multimorbidity of  
50  
51 269 diabetes and CVD, compared with 5% from a recent US survey involving people aged  $\geq 65$   
52  
53 270 years.<sup>20</sup> Previous studies in China and other countries have also shown that the prevalence  
54  
55 271 of multimorbidity increased significantly with age.<sup>9, 21</sup> Older adults should therefore be a  
56  
57 272 major population targeted for cardiometabolic multimorbidity prevention, considering  
58  
59 273 population aging.

1  
2  
3 274  
4  
5 275 Second, over the 5-year follow-up we observed about a one-third higher mortality risk in  
6  
7 276 patients with one condition at baseline, a two-thirds higher risk in patients with two diseases,  
8  
9 277 and just over a two-fold higher risk in patients with all three diseases. Although these results  
10  
11 278 may suggest that associations between mortality and hypertension, diabetes, and  
12  
13 279 cardiovascular disease were additive in this population, we found significant heterogeneities  
14  
15 280 within each disease combination. Patients with only hypertension at baseline had the lowest  
16  
17 281 HR (1.26) and those with CVD only at baseline had a HR of 3.31. This pattern was aggravated  
18  
19 282 by applying longitudinal cardiometabolic disease status information. The HR of patients with  
20  
21 283 hypertension only reduced to 1.07 and that of patients with CVD only increased to 4.8.  
22  
23 284 Among around 70,000 patients with hypertension at baseline, 15,000 developed additional  
24  
25 285 cardiometabolic diseases, and therefore changed their disease status category. In addition,  
26  
27 286 there were around 100,000 (10%) patients with hypertension in this study, and nearly half  
28  
29 287 were identified during follow-up (i.e., suggesting that they were newly diagnosed). Therefore,  
30  
31 288 the analysis using longitudinal disease status information showed that patients with  
32  
33 289 hypertension had a lower HR than that using baseline status. In contrast, there was small  
34  
35 290 number of patients (just over 2,000) with CVD only at baseline. Most patients with history  
36  
37 291 of CVD also had diabetes or hypertension. Around 4,000 healthy participants at baseline  
38  
39 292 developed CVD during follow-up. We speculated that the increment of the HR from 3.3  
40  
41 293 (baseline status) to 4.8 (longitudinal data) may be partly attributable to the relative short-  
42  
43 294 term high risk after a first-ever CVD event. Similarly, we found an increased risk for those  
44  
45 295 with both hypertension and CVD in the longitudinal analysis compared with that using  
46  
47 296 baseline status.

48  
49 297  
50  
51 298 Regardless of the existence of other diseases, a history of CVD tended to dominate risk for  
52  
53 299 mortality, especially over the 5 years of follow-up. Among patients with any cardiometabolic  
54  
55 300 disease, patients with CVD only had the highest risk, which may reflect a short-term effect  
56  
57 301 of newly diagnosed CVD. Alternatively, it may also indicate that patients with other  
58  
59 302 cardiometabolic diseases (e.g., hypertension or diabetes) were likely to be more aware of

1  
2  
3 303 their health condition. Moreover, among those with cardiometabolic multimorbidity, only  
4 304 patients with hypertension and diabetes had significantly lower HR, whereas other groups  
5  
6 305 (i.e., all with CVD) were broadly similar, even those with all three diseases.  
7  
8  
9 306

10 307 Regarding the HRs for mortality from our study, we compared our findings with other studies.  
11  
12 308 In ERFC study (involving 91 cohort studies, mainly Western populations)<sup>16</sup>, the estimated  
13  
14 309 HR for mortality was about 2 in participants with one cardiometabolic multimorbidity  
15  
16 310 condition (type 2 diabetes, coronary heart disease, and stroke) and the association was  
17  
18 311 multiplicative. However, they did not include hypertension and only used baseline disease  
19  
20 312 status. We observed a broadly similar HR for patients with diabetes. The higher HR for  
21  
22 313 patients with CVD (stroke or MI) in our population might be explained by differences in the  
23  
24 314 overall healthcare services across countries with different economic levels. The estimated  
25  
26 315 HR for patients with CVD and diabetes (regardless of hypertension) in our study was around  
27  
28 316 2.5, which was lower than the ERFC estimate (around 3.5–4), but consistent with the  
29  
30 317 Hispanic Established Population for the Epidemiological study of the Elderly (at 2.4).<sup>22</sup> This  
31  
32 318 may imply that ethnic disparity could explain the differences. We also showed that  
33  
34 319 cardiometabolic multimorbidity had a more serious impact on those living in urban areas  
35  
36 320 compared with rural areas. This suggests it is important to consider location differences in  
37  
38 321 developing strategies to improve public health.  
39  
40  
41 322

42  
43 323 The strength of this study was that it was a large-scale, comprehensive study under real-  
44  
45 324 world circumstances. We used longitudinal data for cardiometabolic disease status to assess  
46  
47 325 the prevalence and evolution of cardiometabolic multimorbidity during follow-up. However,  
48  
49 326 this study also had several limitations. First, the CHERRY study is based on a regional  
50  
51 327 population in a developed area of China, and is not nationally representative. Second, this  
52  
53 328 study had relatively short follow-up period and the long-term effect of cardiometabolic  
54  
55 329 multimorbidity needs to be further evaluated. Third, the accurate time of disease onset,  
56  
57 330 especially hypertension and diabetes, were not available. We could only approximate this  
58  
59 331 information using the first diagnosis time for these diseases. Information on medication use  
60

1  
2  
3 332 and risk control was also not available. Finally, our laboratory data sources included lipids  
4  
5 333 measurements for only 25%–30% of the population, which prevented us from model  
6  
7 334 adjustment for conventional lipids risk factors. However, the ERFC results showed broadly  
8  
9 335 similar HRs for cardiometabolic multimorbidity and mortality after further adjustment for  
10  
11 336 smoking, BMI, systolic blood pressure, high-density lipoprotein, total cholesterol,  
12  
13 337 socioeconomic status, and diet.<sup>16</sup>

14 338

## 16 339 **Conclusions**

18 340 The prevalence of patients with cardiometabolic multimorbidity in a general population in  
19  
20 341 China more than doubled over 5 years, indicating a rapid evolution of cardiometabolic  
21  
22 342 multimorbidity. Among all combinations, history of CVD leads the risk for mortality. Our  
23  
24 343 findings highlight the need for a complementary strategy for primary and secondary  
25  
26 344 prevention of cardiometabolic diseases in China.

27 345  
28  
29  
30  
31  
32  
33  
34  
35  
36  
37  
38  
39  
40  
41  
42  
43  
44  
45  
46  
47  
48  
49  
50  
51  
52  
53  
54  
55  
56  
57  
58  
59  
60



1  
2  
3 346 **Acknowledgements**

4 347 The authors thank the Health and Family Planning Bureau of Yinzhou District for providing  
5  
6 348 access to the administrative databases used in the study, and Audrey Holmes, MA, from  
7  
8 349 Liwen Bianji, Edanz Group China ([www.liwenbianji.cn/ac](http://www.liwenbianji.cn/ac)) for editing the English text of a  
9  
10 350 draft of this manuscript.  
11

12  
13 351

14 352 **Data sharing statement**

15  
16 353 No additional data available.  
17  
18  
19

20 354 **Authors' contributions**

21  
22 355 DZ, XT, and PG drafted the manuscript. DZ, XT, PS, and PG conceived and designed the  
23  
24 356 study. DZ, YS, and HL made substantial contributions to the study design. XT, XL, PS and  
25  
26 357 HL are responsible for study coordination; XT, PS, JW, JZ and HL are responsible for data  
27  
28 358 quality control; DZ, PL, and YS are responsible for data wrangling; XT, DZ, YS, XL, ZX and  
29  
30 359 PG are responsible for data analysis. All authors contributed to the writing of the manuscript  
31  
32 360 in an iterative manner, and have read and approved the final manuscript.  
33  
34  
35 361

36  
37  
38 362 **Funding**

39  
40 363 This study is supported by the National Natural Science Foundation of China (91546120,  
41  
42 364 81573226), and the National Thousand Talents Program for Distinguished Young Scholars,  
43  
44 365 China (QNQR201501).  
45  
46 366

47  
48  
49  
50 367 **Competing interests**

51  
52 368 None declared.  
53  
54 369  
55  
56  
57  
58  
59  
60

## References

1. Tinetti ME, Fried TR, Boyd CM. Designing health care for the most common chronic condition--multimorbidity. *Jama* 2012;307(23):2493-4. doi: 10.1001/jama.2012.5265 [published Online First: 2012/07/17]
2. Glynn LG. Multimorbidity: another key issue for cardiovascular medicine. *Lancet* 2009;374(9699):1421-2. doi: 10.1016/s0140-6736(09)61863-8 [published Online First: 2009/10/27]
3. Barnett K, Mercer SW, Norbury M, et al. Epidemiology of multimorbidity and implications for health care, research, and medical education: a cross-sectional study. *Lancet* 2012;380(9836):37-43. doi: 10.1016/S0140-6736(12)60240-2
4. Wang L, Gao P, Zhang M, et al. Prevalence and Ethnic Pattern of Diabetes and Prediabetes in China in 2013. *Jama* 2017;317(24):2515-23. doi: 10.1001/jama.2017.7596
5. Wang W, Jiang B, Sun H, et al. Prevalence, Incidence, and Mortality of Stroke in China: Results from a Nationwide Population-Based Survey of 480 687 Adults. *Circulation* 2017;135(8):759-71. doi: 10.1161/circulationaha.116.025250 [published Online First: 2017/01/06]
6. Chen WW, Gao RL, Liu LS, et al. China cardiovascular diseases report 2015: a summary. *Journal of geriatric cardiology : JGC* 2017;14(1):1-10. doi: 10.11909/j.issn.1671-5411.2017.01.012 [published Online First: 2017/03/09]
7. Wu Y, Benjamin EJ, MacMahon S. Prevention and Control of Cardiovascular Disease in the Rapidly Changing Economy of China. *Circulation* 2016;133(24):2545-60. doi: 10.1161/circulationaha.115.008728 [published Online First: 2016/06/15]
8. Wang SB, D'Arcy C, Yu YQ, et al. Prevalence and patterns of multimorbidity in northeastern China: a cross-sectional study. *Public Health* 2015;129(11):1539-46. doi: 10.1016/j.puhe.2015.06.013
9. Wang HH, Wang JJ, Wong SY, et al. Epidemiology of multimorbidity in China and implications for the healthcare system: cross-sectional survey among 162,464 community

- 1  
2  
3 household residents in southern China. *BMC Med* 2014;12:188. doi: 10.1186/s12916-014-  
4 0188-0 [published Online First: 2014/10/24]  
5  
6  
7 10. Hu X, Huang J, Lv Y, et al. Status of prevalence study on multimorbidity of chronic  
8 disease in China: systematic review. *Geriatr Gerontol Int* 2015;15(1):1-10. doi:  
9 10.1111/ggi.12340  
10  
11  
12  
13 11. Gu J, Chao J, Chen W, et al. Multimorbidity in the community-dwelling elderly in urban  
14 China. *Arch Gerontol Geriatr* 2017;68:62-67. doi: 10.1016/j.archger.2016.09.001  
15 [published Online First: 2016/09/23]  
16  
17  
18  
19 12. Ruel G, Levesque JF, Stocks N, et al. Understanding the evolution of multimorbidity:  
20 evidences from the North West Adelaide Health Longitudinal Study (NWAHS). *PloS one*  
21 2014;9(5):e96291. doi: 10.1371/journal.pone.0096291 [published Online First:  
22 2014/05/07]  
23  
24  
25  
26  
27 13. Bragg F, Holmes MV, Iona A, et al. Association Between Diabetes and Cause-Specific  
28 Mortality in Rural and Urban Areas of China. *Jama* 2017;317(3):280-89. doi:  
29 10.1001/jama.2016.19720  
30  
31  
32  
33 14. Yang G, Wang Y, Zeng Y, et al. Rapid health transition in China, 1990-2010: findings  
34 from the Global Burden of Disease Study 2010. *Lancet* 2013;381(9882):1987-2015. doi:  
35 10.1016/s0140-6736(13)61097-1 [published Online First: 2013/06/12]  
36  
37  
38  
39 15. Lewington S, Lacey B, Clarke R, et al. The Burden of Hypertension and Associated Risk  
40 for Cardiovascular Mortality in China. *JAMA internal medicine* 2016;176(4):524-32. doi:  
41 10.1001/jamainternmed.2016.0190 [published Online First: 2016/03/15]  
42  
43  
44  
45 16. Emerging Risk Factors C, Di Angelantonio E, Kaptoge S, et al. Association of  
46 Cardiometabolic Multimorbidity With Mortality. *JAMA* 2015;314(1):52-60. doi:  
47 10.1001/jama.2015.7008  
48  
49  
50  
51 17. Lin H, Tang X, Shen P, et al. Using big data to improve cardiovascular care and  
52 outcomes in China: a protocol for the CHinese Electronic health Records Research in  
53 Yinzhou (CHERRY) Study. *BMJ Open* 2018;8(2):e019698. doi: 10.1136/bmjopen-2017-  
54 019698 [published Online First: 2018/02/15]  
55  
56  
57  
58  
59 18. Wang JB, Gu MJ, Shen P, et al. Body Mass Index and Mortality: A 10-Year Prospective  
60

1  
2  
3 Study in China. Scientific reports 2016;6:31609. doi: 10.1038/srep31609 [published  
4 Online First: 2016/08/23]  
5

6  
7 19. Body-mass index and all-cause mortality: individual-participant-data meta-analysis of  
8  
9 239 prospective studies in four continents. Lancet 2016;388(10046):776-86. doi:  
10 10.1016/s0140-6736(16)30175-1 [published Online First: 2016/07/18]  
11  
12

13 20. Weiss CO, Boyd CM, Yu Q, et al. Patterns of prevalent major chronic disease among  
14  
15 older adults in the United States. Jama 2007;298(10):1160-2 doi:  
16 10.1001/jama.298.10.1160-b[published Online First: Epub Date]  
17  
18

19 21. Barnett K, Mercer SW, Norbury M, et al. Epidemiology of multimorbidity and  
20  
21 implications for health care, research, and medical education: a cross-sectional study.  
22  
23 Lancet 2012;380(9836):37-43 doi: 10.1016/s0140-6736(12)60240-2[published Online  
24  
25 First: Epub Date]  
26

27 22. Otiniano ME, Du XL, Ottenbacher K, et al. The effect of diabetes combined with stroke  
28  
29 on disability, self-rated health, and mortality in older Mexican Americans: results from the  
30  
31 Hispanic EPESE. Arch Phys Med Rehabil 2003;84(5):725-30. [published Online First:  
32  
33 2003/05/09]  
34  
35

**Table 1. Characteristics of participants at baseline.**

|                                                      | <b>Participants ≥18 years</b> | <b>Participants ≥40 years</b> |
|------------------------------------------------------|-------------------------------|-------------------------------|
| <b>No. (%) of participants</b>                       | 1,038,704                     | 545,632                       |
| <b>Age (at baseline) mean (SD)</b>                   | 42.51 (14.84)                 | 53.58 (11.63)                 |
| <b>Body mass index (kg/m<sup>2</sup>) mean (SD)</b>  | 22.48 (2.53)                  | 22.94 (2.66)                  |
| <b>BMI (kg/m<sup>2</sup> Asian-specific cutoffs)</b> |                               |                               |
| <23 (Normal)                                         | 562,106 (62.04)               | 264,283 (53.65)               |
| 23-<25 (Overweight)                                  | 218,019 (24.06)               | 134,411 (27.29)               |
| ≥25 (Obese)                                          | 125,862 (13.89)               | 93,869 (19.06)                |
| <b>Gender No. (%)</b>                                |                               |                               |
| Male                                                 | 504,525 (48.57)               | 275,382 (50.47)               |
| Female                                               | 534,179 (51.43)               | 270,250 (49.53)               |
| <b>Location No. (%)</b>                              |                               |                               |
| Urban                                                | 316,900 (30.90)               | 168,208 (31.18)               |
| Rural                                                | 708,642 (69.10)               | 371,311 (68.82)               |
| <b>Education levels No. (%)</b>                      |                               |                               |
| Primary school or lower                              | 249,881 (29.11)               | 219,934 (45.78)               |
| Middle school                                        | 547,890 (63.83)               | 248,425 (51.71)               |
| College or higher                                    | 60,642 (7.06)                 | 12,046 (2.51)                 |
| <b>Smoking status (Current) No. (%)</b>              |                               |                               |
| Never                                                | 726,241 (78.87)               | 388,223 (77.15)               |
| Former smoker                                        | 20,524 (2.23)                 | 17,678 (3.51)                 |
| Current smoker                                       | 174,084 (18.90)               | 97,328 (19.34)                |

**Table 2. Standardized prevalence of cardiometabolic disease status at baseline.**

|                       | Overall (N=1,038,704) |                  | Male (N=504,525) |                  | Female (N=534,179) |                    |
|-----------------------|-----------------------|------------------|------------------|------------------|--------------------|--------------------|
|                       | No. of cases          | % (95% CI)       | No. of cases     | % (95% CI)       | No. of cases       | % (95% CI)         |
| <b>One disease</b>    | 85,684                | 9.32 (9.26-9.37) | 40,883           | 8.64 (8.57-8.72) | 44,801             | 10.01 (9.93-10.09) |
| HT                    | 69,406                | 7.60 (7.55-7.65) | 32,697           | 6.96 (6.89-7.02) | 36,709             | 8.25 (8.18-8.33)   |
| DM                    | 14,127                | 1.49 (1.46-1.51) | 6,992            | 1.43 (1.40-1.47) | 7,135              | 1.54 (1.51-1.58)   |
| CVD                   | 2,151                 | 0.23 (0.22-0.24) | 1,194            | 0.25 (0.24-0.27) | 957                | 0.21 (0.20-0.23)   |
| <b>Two diseases</b>   | 22,871                | 2.57 (2.54-2.60) | 10,349           | 2.24 (2.20-2.29) | 12,522             | 2.90 (2.85-2.95)   |
| HT+DM                 | 11,073                | 1.26 (1.24-1.29) | 4,722            | 1.03 (1.00-1.06) | 6,351              | 1.50 (1.46-1.53)   |
| HT+CVD                | 11,540                | 1.28 (1.25-1.30) | 5,481            | 1.18 (1.15-1.21) | 6,059              | 1.38 (1.34-1.41)   |
| DM+CVD                | 258                   | 0.03 (0.02-0.03) | 146              | 0.03 (0.03-0.04) | 112                | 0.03 (0.02-0.03)   |
| <b>Three diseases</b> | 2,203                 | 0.26 (0.25-0.27) | 841              | 0.19 (0.17-0.20) | 1,362              | 0.33 (0.31-0.35)   |

HT, hypertension; DM, diabetes mellitus; CVD, cardiovascular disease.

**Table 3. Population attributable fractions for cardiometabolic multimorbidity.**

|                                                                                                            | Multimorbidity (% [95% CI]) |                     |                  | Total               |
|------------------------------------------------------------------------------------------------------------|-----------------------------|---------------------|------------------|---------------------|
|                                                                                                            | 1 disease                   | 2 diseases          | ≥3 diseases      |                     |
| <b>Using the prevalence and HRs of cardiometabolic multimorbidity at baseline</b>                          |                             |                     |                  |                     |
| Participants ≥ 18years                                                                                     | 3.30 (2.95-3.65)            | 1.73 (1.56-1.90)    | 0.30 (0.25-0.36) | 5.34 (4.96-5.72)    |
| Men                                                                                                        | 3.10 (2.65-3.54)            | 1.45 (1.24-1.65)    | 0.18 (0.12-0.24) | 4.72 (4.24-5.21)    |
| Women                                                                                                      | 3.68 (3.13-4.22)            | 2.11 (1.83-2.39)    | 0.44 (0.35-0.54) | 6.23 (5.62-6.83)    |
| Participants ≥ 40years                                                                                     | 5.10 (4.52-5.68)            | 2.85 (2.56-3.14)    | 0.50 (0.40-0.59) | 8.44 (7.82-9.07)    |
| Participants ≥ 60years                                                                                     | 6.11 (5.07-7.16)            | 4.60 (4.01-5.18)    | 0.96 (0.75-1.17) | 11.67 (10.54-12.81) |
| <b>Using the prevalence at last visit and HRs using time-variant cardiometabolic multimorbidity status</b> |                             |                     |                  |                     |
| Participants ≥ 18years                                                                                     | 4.17 (3.70-4.63)            | 4.36 (4.07-4.65)    | 2.13 (1.92-2.35) | 10.66 (10.11-11.21) |
| Men                                                                                                        | 4.19 (3.57-4.82)            | 4.14 (3.76-4.52)    | 1.69 (1.43-1.94) | 10.02 (9.30-10.75)  |
| Women                                                                                                      | 4.33 (3.62-5.05)            | 4.75 (4.30-5.20)    | 2.71 (2.35-3.07) | 11.80 (10.95-12.64) |
| Participants ≥ 40years                                                                                     | 5.92 (5.18-6.65)            | 6.95 (6.48-7.41)    | 3.49 (3.13-3.84) | 16.35 (15.52-17.18) |
| Participants ≥ 60years                                                                                     | 6.47 (5.36-7.58)            | 11.03 (10.19-11.88) | 5.75 (5.09-6.41) | 23.25 (21.98-24.53) |

HT, hypertension; DM, diabetes mellitus; CVD, cardiovascular disease.

## Figure legends

### **Figure 1. Prevalence of cardiometabolic disease according to age groups.**

Note: HT, hypertension; DM, diabetes mellitus; CVD, cardiovascular disease.

### **Figure 2. Evolution of cardiometabolic disease status during follow-up.**

Note: \*Crude prevalence; HT, hypertension; DM, diabetes mellitus; CVD, cardiovascular disease.

### **Figure 3. Age- and sex-adjusted HRs (95%) for all-cause mortality by cardiometabolic disease status.**

Note: HT, hypertension; DM, diabetes mellitus; CVD, cardiovascular disease.



1  
2  
3  
4  
5  
6  
7  
8  
9  
10  
11  
12  
13  
14  
15  
16  
17  
18  
19  
20  
21  
22  
23  
24  
25  
26  
27  
28  
29  
30  
31  
32  
33  
34  
35  
36  
37  
38  
39  
40  
41  
42  
43  
44  
45  
46  
47  
48  
49  
50  
51  
52  
53  
54  
55  
56  
57  
58  
59  
60

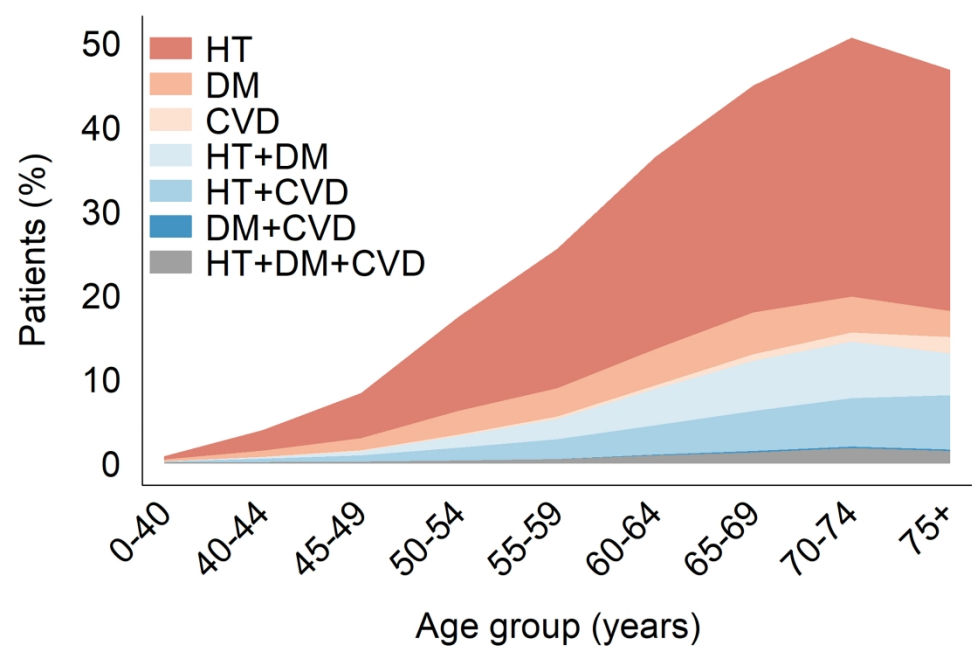

Figure 1. Prevalence of cardiometabolic disease according to age groups.

299x199mm (300 x 300 DPI)

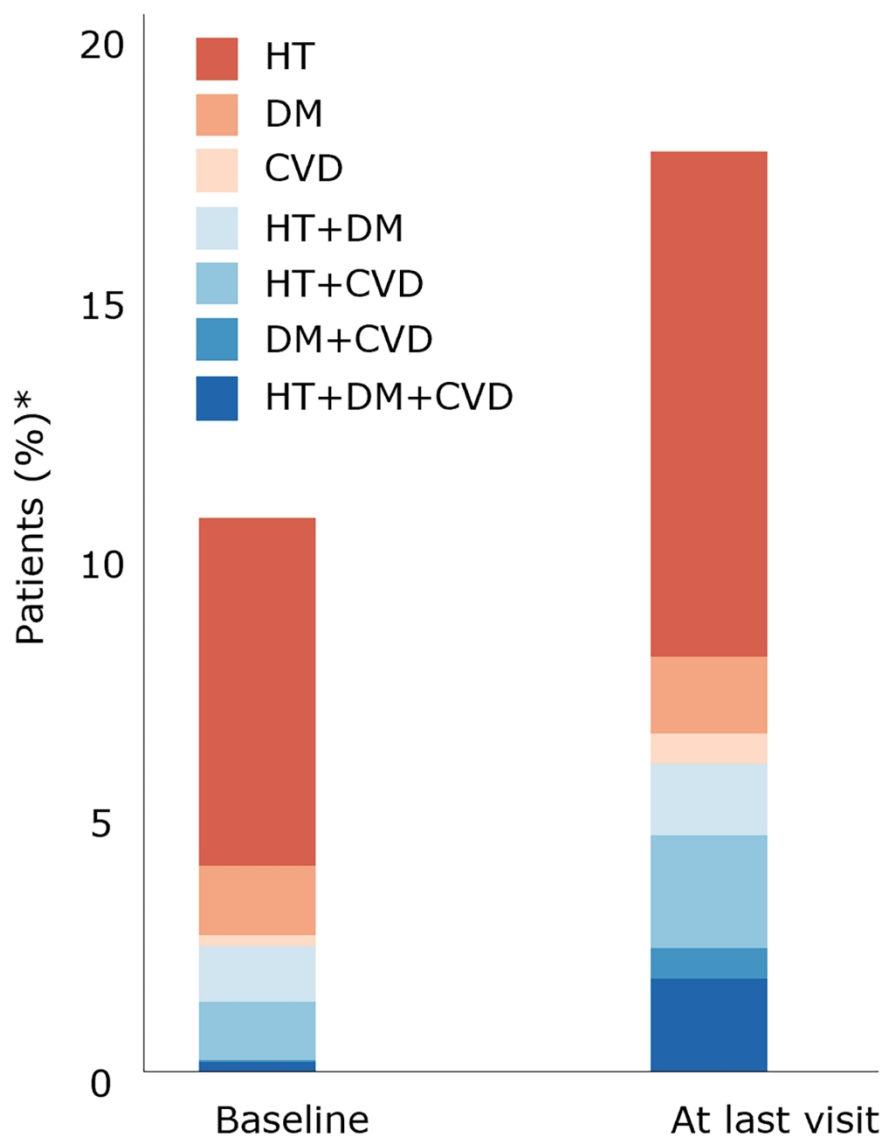

Figure 2. Evolution of cardiometabolic disease status during follow-up.

153x199mm (300 x 300 DPI)

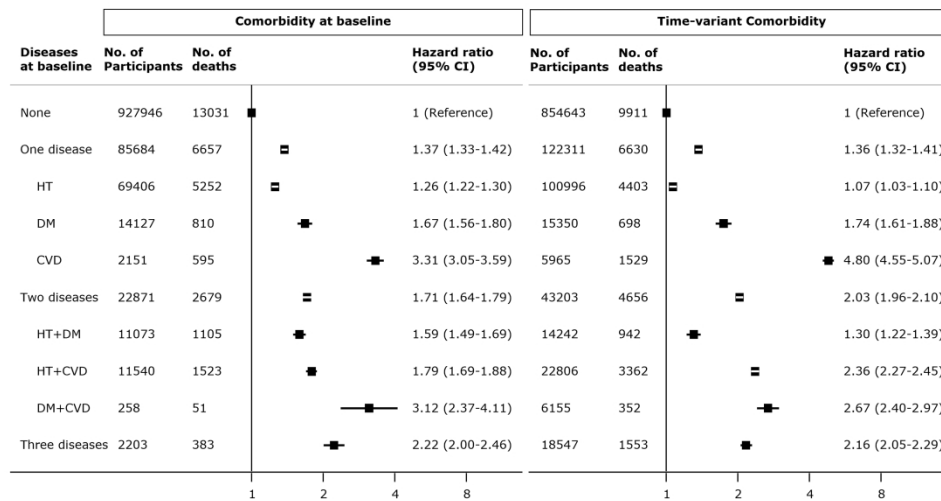

Figure 3. Age- and sex-adjusted HRs (95%) for all-cause mortality by cardiometabolic disease status.

371x199mm (300 x 300 DPI)

## Supplementary Material

### Multimorbidity of cardiometabolic diseases: Prevalence and Risk of Mortality from One Million Chinese Adults in a Longitudinal Cohort Study

|                                                                                                                                                                                                                             |   |
|-----------------------------------------------------------------------------------------------------------------------------------------------------------------------------------------------------------------------------|---|
| eFigure 1. Flow chart of inclusion of participants in CHERRY study. ....                                                                                                                                                    | 2 |
| eTable 1. Standardized prevalence of cardiometabolic multimorbidity at baseline (age $\geq$ 40 years). 3                                                                                                                    |   |
| eTable 2. Standardized prevalence of cardiometabolic multimorbidity at baseline (age $\geq$ 60 years). 4                                                                                                                    |   |
| eTable 3. Evolution of cardiometabolic disease status during follow-up. ....                                                                                                                                                | 5 |
| eTable 4. Age- and sex-adjusted HRs (95%) for all-cause mortality by cardiometabolic multimorbidity at baseline according to individuals' subgroups. ....                                                                   | 6 |
| eTable 5. Age- and sex-adjusted HRs (95%) for all-cause mortality by cardiometabolic multimorbidity at baseline exclude follow-up less than one year. ....                                                                  | 8 |
| eTable 6. HRs (95%) for all-cause mortality in participants with full information on cardiovascular risk factors and other characteristics ( $\geq$ 18 years, baseline vs repeat exclude diseases in 30 days of death)..... | 9 |

eFigure 1. Flow chart of inclusion of participants in CHERRY study.

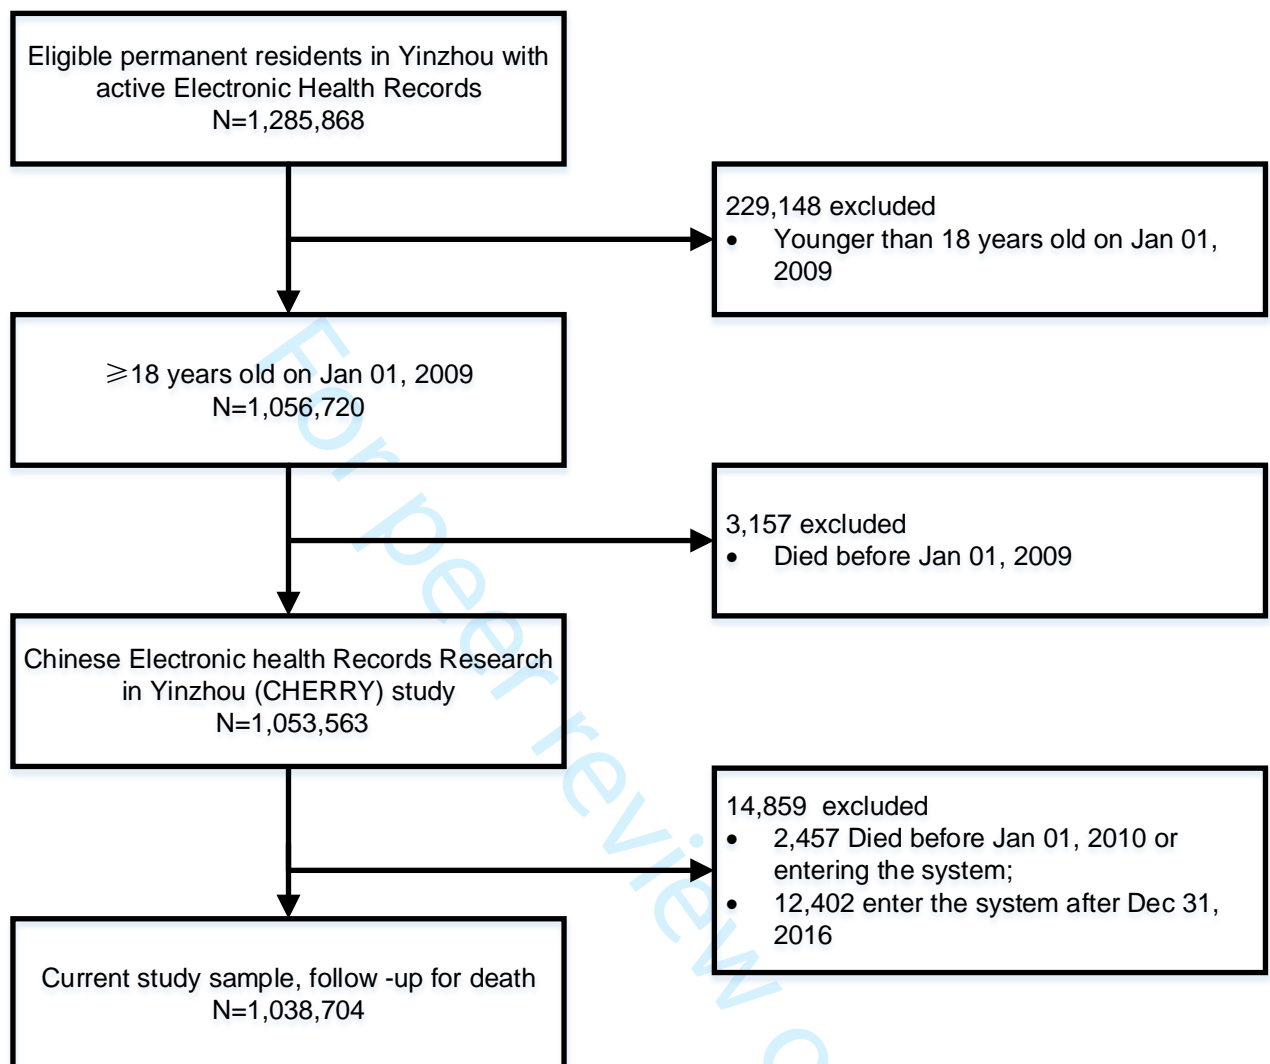

eTable 1. Standardized prevalence of cardiometabolic multimorbidity at baseline (age≥40 years).

|                       | Overall (N=545,632) |                     | Male (N=275,382) |                     | Female (N=270,250) |                     |
|-----------------------|---------------------|---------------------|------------------|---------------------|--------------------|---------------------|
|                       | No. of cases        | % (95% CI)          | No. of cases     | % (95% CI)          | No. of cases       | % (95% CI)          |
| <b>One disease</b>    | 82,589              | 16.82 (16.72-16.92) | 39,133           | 15.54 (15.40-15.68) | 43,456             | 18.11 (17.96-18.26) |
| HT                    | 67,505              | 13.81 (13.71-13.90) | 31,512           | 12.58 (12.46-12.71) | 35,993             | 15.05 (14.91-15.19) |
| DM                    | 13,041              | 2.59 (2.55-2.64)    | 6,481            | 2.50 (2.44-2.57)    | 6,560              | 2.68 (2.62-2.75)    |
| CVD                   | 2,043               | 0.42 (0.40-0.44)    | 1,140            | 0.45 (0.43-0.48)    | 903                | 0.38 (0.35-0.40)    |
| <b>Two diseases</b>   | 22,405              | 4.69 (4.65-4.75)    | 10,065           | 4.09 (4.01-4.16)    | 12,340             | 5.31 (5.22-5.40)    |
| HT+DM                 | 10,966              | 2.33 (2.28-2.36)    | 4,656            | 1.90 (1.85-1.96)    | 6,310              | 2.76 (2.69-2.82)    |
| HT+CVD                | 11,186              | 2.31 (2.27-2.36)    | 5,268            | 2.12 (2.07-2.18)    | 5,918              | 2.50 (2.44-2.57)    |
| DM+CVD                | 253                 | 0.05 (0.05-0.06)    | 141              | 0.06 (0.05-0.07)    | 112                | 0.05 (0.04-0.06)    |
| <b>Three diseases</b> | 2,185               | 0.47 (0.45-0.49)    | 828              | 0.34 (0.32-0.37)    | 1,357              | 0.60 (0.57-0.64)    |

HT, hypertension; DM, diabetes mellitus; CVD, cardiovascular disease.

eTable 2. Standardized prevalence of cardiometabolic multimorbidity at baseline (age≥60 years).

|                       | Overall (N=61,339) |                     | Male (N=28,431) |                     | Female (N=32,908) |                     |
|-----------------------|--------------------|---------------------|-----------------|---------------------|-------------------|---------------------|
|                       | No. of cases       | % (95% CI)          | No. of cases    | % (95% CI)          | No. of cases      | % (95% CI)          |
| <b>One disease</b>    | 45,083             | 31.90 (31.65-32.14) | 21,351          | 30.06 (29.72-30.40) | 23,732            | 33.66 (33.31-34.01) |
| HT                    | 37,777             | 26.77 (26.54-27.00) | 17,807          | 25.12 (24.80-25.44) | 19,970            | 28.36 (28.02-28.70) |
| DM                    | 5,833              | 4.12 (4.02-4.23)    | 2,733           | 3.84 (3.70-3.98)    | 3,100             | 4.39 (4.24-4.54)    |
| CVD                   | 1,473              | 1.00 (0.95-1.06)    | 811             | 1.10 (1.03-1.18)    | 662               | 0.91 (0.84-0.98)    |
| <b>Two diseases</b>   | 14,597             | 10.41 (10.25-10.57) | 6,448           | 9.11 (8.90-9.33)    | 8,149             | 11.65 (11.41-11.90) |
| HT+DM                 | 7,398              | 5.32 (5.20-5.44)    | 3,057           | 4.33 (4.18-4.49)    | 4,341             | 6.26 (6.08-6.45)    |
| HT+CVD                | 7,005              | 4.96 (4.84-5.07)    | 3,288           | 4.64 (4.48-4.79)    | 3,717             | 5.27 (5.10-5.44)    |
| DM+CVD                | 194                | 0.13 (0.11-0.15)    | 103             | 0.14 (0.11-0.17)    | 91                | 0.12 (0.10-0.15)    |
| <b>Three diseases</b> | 1,659              | 1.20 (1.14-1.26)    | 632             | 0.89 (0.82-0.96)    | 1,027             | 1.49 (1.40-1.58)    |

HT, hypertension; DM, diabetes mellitus; CVD, cardiovascular disease.

eTable 3. Evolution of cardiometabolic disease status during follow-up.

| Number of disorders<br>at baseline | Number of disorders at last visit |                     |                    |                   |                  |                   |                   |                   |                  |                   |                    |
|------------------------------------|-----------------------------------|---------------------|--------------------|-------------------|------------------|-------------------|-------------------|-------------------|------------------|-------------------|--------------------|
|                                    | None                              | One disease         | HT                 | DM                | CVD              | Two diseases      | HT+DM             | HT+CVD            | DM+CVD           | Three diseases    | Total              |
| <b>None</b>                        | 854,643<br>(92.1%)                | 60,668<br>(6.5%)    | 47,903<br>(5.2%)   | 8,388<br>(0.9%)   | 4,377<br>(0.5%)  | 9,931<br>(1.1%)   | 4,322<br>(0.5%)   | 2,798<br>(0.3%)   | 2,811<br>(0.30%) | 2,704<br>(0.3%)   | 927,946<br>(89.3%) |
| <b>One disease</b>                 |                                   | 61,643<br>(71.9%)   |                    |                   |                  | 18,266<br>(21.3%) |                   |                   |                  | 5,775<br>(6.7%)   | 85,684<br>(8.2%)   |
| HT                                 |                                   |                     | 53,093<br>(76.5%)  |                   |                  |                   | 3,602<br>(5.2%)   | 9,279<br>(13.4%)  |                  | 3,432<br>(4.9%)   | 69,406<br>(6.7%)   |
| DM                                 |                                   |                     |                    | 6,962<br>(49.3%)  |                  |                   | 1,779<br>(12.6%)  |                   | 3,121<br>(22.1%) | 2,265<br>(16.0%)  | 14,127<br>(1.4%)   |
| CVD                                |                                   |                     |                    |                   | 1,588<br>(73.8%) |                   |                   | 437<br>(20.3%)    | 48<br>(2.2%)     | 78<br>(3.6%)      | 2,151<br>(0.2%)    |
| <b>Two diseases</b>                |                                   |                     |                    |                   |                  | 15,006<br>(65.6%) |                   |                   |                  | 7,865<br>(34.4%)  | 22,871<br>(2.2%)   |
| HT+DM                              |                                   |                     |                    |                   |                  |                   | 4,539<br>(41.0%)  |                   |                  | 6,534<br>(59.0%)  | 11,073<br>(1.1%)   |
| HT+CVD                             |                                   |                     |                    |                   |                  |                   |                   | 10,292<br>(89.2%) |                  | 1,248<br>(10.8%)  | 11,540<br>(1.1%)   |
| DM+CVD                             |                                   |                     |                    |                   |                  |                   |                   |                   | 175<br>(67.8%)   | 83<br>(32.2%)     | 258<br>(0.0%)      |
| <b>Three diseases</b>              |                                   |                     |                    |                   |                  |                   |                   |                   |                  | 2,203<br>(0.2%)   | 2,203<br>(0.2%)    |
| <b>Total</b>                       | 854,643<br>(82.28%)               | 122,311<br>(11.78%) | 100,996<br>(9.72%) | 15,350<br>(1.48%) | 5,965<br>(0.57%) | 43,203<br>(4.16%) | 14,242<br>(1.37%) | 22,806<br>(2.20%) | 6,155<br>(0.59%) | 18,547<br>(1.79%) | 1,038,704          |

HT, hypertension; DM, diabetes mellitus; CVD, cardiovascular disease.



eTable 4. Age- and sex-adjusted HRs (95%) for all-cause mortality by cardiometabolic multimorbidity at baseline according to individuals' subgroups.

| Subgroup                                  |                               | Number of disorders | n (total)           | n (death) | HR (95% CI)      |                  |
|-------------------------------------------|-------------------------------|---------------------|---------------------|-----------|------------------|------------------|
| <b>Gender</b>                             | <b>Men</b>                    | 0                   | 452,452             | 7,390     | 1                |                  |
|                                           |                               | 1                   | 40,883              | 3,481     | 1.38 (1.32-1.43) |                  |
|                                           |                               | 2                   | 10,349              | 1,316     | 1.68 (1.58-1.78) |                  |
|                                           |                               | 3                   | 841                 | 155       | 2.01 (1.71-2.36) |                  |
|                                           | <b>Women</b>                  | 0                   | 475,494             | 5,641     | 1                |                  |
|                                           |                               | 1                   | 44,801              | 3,176     | 1.39 (1.33-1.45) |                  |
|                                           |                               | 2                   | 12,522              | 1,363     | 1.78 (1.67-1.88) |                  |
|                                           |                               | 3                   | 1,362               | 228       | 2.44 (2.14-2.78) |                  |
|                                           |                               | <b>Age groups</b>   | <b>&lt;40 years</b> | 0         | 489,493          | 391              |
| 1                                         | 3,095                         |                     |                     | 22        | 4.74 (3.06-7.33) |                  |
| ≥2                                        | 484                           |                     |                     | 2         | 1.91 (0.47-7.67) |                  |
| <b>40-59 years</b>                        | 0                             |                     | 356,879             | 2,856     | 1                |                  |
|                                           | 1                             |                     | 37,506              | 538       | 1.10 (1.00-1.21) |                  |
|                                           | 2                             |                     | 7,808               | 157       | 1.32 (1.13-1.56) |                  |
|                                           | 3                             |                     | 526                 | 16        | 1.87 (1.14-3.05) |                  |
|                                           | <b>≥60 years</b>              |                     | 0                   | 81,574    | 9,784            | 1                |
|                                           |                               |                     | 1                   | 45,083    | 6,097            | 1.22 (1.18-1.26) |
| 2                                         |                               |                     | 14,597              | 2,520     | 1.50 (1.44-1.57) |                  |
| 3                                         |                               |                     | 1,659               | 367       | 1.91 (1.72-2.12) |                  |
| <b>BMI (kg/m2 Asian-specific cutoffs)</b> | <b>&lt;23 (Normal)</b>        |                     | 0                   | 520,434   | 6,971            | 1                |
|                                           |                               |                     | 1                   | 33,112    | 3,407            | 1.18 (1.13-1.23) |
|                                           |                               | 2                   | 7,879               | 1,223     | 1.47 (1.38-1.56) |                  |
|                                           |                               | 3                   | 681                 | 141       | 1.79 (1.51-2.11) |                  |
|                                           | <b>23-&lt;25 (Overweight)</b> | 0                   | 187,405             | 2,617     | 1                |                  |
|                                           |                               | 1                   | 23,757              | 1,490     | 0.98 (0.92-1.04) |                  |
|                                           |                               | 2                   | 6,294               | 588       | 1.16 (1.06-1.27) |                  |
|                                           |                               | 3                   | 563                 | 94        | 1.61 (1.31-1.98) |                  |
|                                           |                               | <b>≥25 (Obese)</b>  | 0                   | 89,870    | 1,430            | 1                |

|                               |                                   |   |         |        |                  |
|-------------------------------|-----------------------------------|---|---------|--------|------------------|
|                               |                                   | 1 | 26,650  | 1,266  | 0.98 (0.90-1.05) |
|                               |                                   | 2 | 8,404   | 705    | 1.32 (1.21-1.45) |
|                               |                                   | 3 | 938     | 132    | 1.85 (1.55-2.21) |
| <b>BMI (kg/m<sup>2</sup>)</b> | <b>&lt;25 (Normal)</b>            | 0 | 707,839 | 9,588  | 1                |
|                               |                                   | 1 | 56,869  | 4,897  | 1.10 (1.07-1.14) |
|                               |                                   | 2 | 14,173  | 1,811  | 1.34 (1.28-1.41) |
|                               |                                   | 3 | 1,244   | 235    | 1.71 (1.50-1.94) |
|                               | <b>25-&lt;30<br/>(Overweight)</b> | 0 | 84,326  | 1,325  | 1                |
|                               |                                   | 1 | 23,991  | 1,132  | 0.97 (0.90-1.05) |
|                               |                                   | 2 | 7,459   | 612    | 1.30 (1.18-1.43) |
|                               |                                   | 3 | 804     | 115    | 1.86 (1.53-2.25) |
|                               | <b>≥30 (Obese)</b>                | 0 | 5,544   | 105    | 1                |
|                               |                                   | 1 | 2,659   | 134    | 1.01 (0.78-1.31) |
|                               |                                   | 2 | 945     | 93     | 1.55 (1.17-2.06) |
|                               |                                   | 3 | 134     | 17     | 1.79 (1.07-3.00) |
| <b>Smoking status</b>         | <b>Current smoker</b>             | 0 | 162,325 | 1,762  | 1                |
|                               |                                   | 1 | 9,186   | 615    | 1.27 (1.15-1.39) |
|                               |                                   | 2 | 2,411   | 236    | 1.50 (1.31-1.72) |
|                               |                                   | 3 | 162     | 30     | 2.81 (1.96-4.04) |
|                               | <b>Non-current smoker</b>         | 0 | 650,393 | 10,132 | 1                |
|                               |                                   | 1 | 73,932  | 5,914  | 1.16 (1.12-1.20) |
|                               |                                   | 2 | 20,400  | 2,433  | 1.45 (1.39-1.52) |
|                               |                                   | 3 | 2,040   | 352    | 1.83 (1.64-2.03) |
| <b>Region</b>                 | <b>Rural</b>                      | 0 | 638,725 | 10,421 | 1                |
|                               |                                   | 1 | 53,347  | 5,343  | 1.39 (1.35-1.44) |
|                               |                                   | 2 | 15,043  | 2,015  | 1.57 (1.50-1.65) |
|                               |                                   | 3 | 1,527   | 295    | 2.01 (1.79-2.25) |
|                               | <b>Urban</b>                      | 0 | 279,407 | 2,521  | 1                |
|                               |                                   | 1 | 29,368  | 1,267  | 1.30 (1.21-1.39) |
|                               |                                   | 2 | 7,468   | 628    | 2.06 (1.89-2.25) |
|                               |                                   | 3 | 657     | 84     | 2.54 (2.04-3.15) |

**eTable 5. Age- and sex-adjusted HRs (95%) for all-cause mortality by cardiometabolic multimorbidity at baseline exclude follow-up less than one year.**

| <b>Diseases at baseline</b> | <b>No. of Participants</b> | <b>No. of deaths</b> | <b>HR (95% CI)</b> |
|-----------------------------|----------------------------|----------------------|--------------------|
| <b>None</b>                 | 916,681                    | 10,941               | 1                  |
| <b>One diseases</b>         | 82,959                     | 5,945                | 1.46 (1.42-1.51)   |
| HT                          | 67,560                     | 4,767                | 1.35 (1.31-1.40)   |
| DM                          | 13,443                     | 729                  | 1.83 (1.70-1.97)   |
| CVD                         | 1,956                      | 449                  | 3.10 (2.82-3.40)   |
| <b>Two diseases</b>         | 22,393                     | 2,394                | 1.82 (1.74-1.90)   |
| HT+DM                       | 10,848                     | 1,024                | 1.75 (1.64-1.87)   |
| HT+CVD                      | 11,317                     | 1,331                | 1.85 (1.74-1.95)   |
| DM+CVD                      | 228                        | 39                   | 3.07 (2.24-4.20)   |
| <b>Three diseases</b>       | 2,142                      | 343                  | 2.36 (2.12-2.63)   |

HT, hypertension; DM, diabetes mellitus; CVD, cardiovascular disease

**eTable 6. HRs (95%) for all-cause mortality in participants with full information on cardiovascular risk factors and other characteristics (≥18 years, baseline vs repeat exclude diseases in 30 days of death).**

|                                     | No. of Participants | No. of Deaths | Model 1<br>Age and Sex | Model 2<br>Age, Sex and<br>BMI | Model 3<br>Age, Sex and<br>Smoking | Model 4<br>Age, Sex,<br>Smoking and<br>BMI | Model 5<br>Age, Sex,<br>Smoking, BMI,<br>Education and<br>Region |
|-------------------------------------|---------------------|---------------|------------------------|--------------------------------|------------------------------------|--------------------------------------------|------------------------------------------------------------------|
| <b>Comorbidity at baseline</b>      |                     |               |                        |                                |                                    |                                            |                                                                  |
| 0                                   | 687,478             | 10,607        | 1                      | 1                              | 1                                  | 1                                          | 1                                                                |
| 1                                   | 77,125              | 6,019         | 1.04 (1.01, 1.07)      | 1.03 (0.99, 1.06)              | 1.08 (1.04, 1.11)                  | 1.06 (1.03, 1.10)                          | 1.09 (1.06, 1.13)                                                |
| 2                                   | 21,945              | 2,470         | 1.26 (1.21, 1.32)      | 1.25 (1.19, 1.31)              | 1.33 (1.28, 1.40)                  | 1.32 (1.26, 1.38)                          | 1.35 (1.29, 1.41)                                                |
| 3                                   | 2,155               | 363           | 1.64 (1.48, 1.82)      | 1.63 (1.47, 1.81)              | 1.77 (1.60, 1.97)                  | 1.76 (1.58, 1.95)                          | 1.79 (1.61, 1.98)                                                |
| <b>Comorbidity during follow-up</b> |                     |               |                        |                                |                                    |                                            |                                                                  |
| 0                                   | 617,490             | 7,743         | 1                      | 1                              | 1                                  | 1                                          | 1                                                                |
| 1                                   | 111,227             | 5,872         | 0.96 (0.93, 1.00)      | 0.95 (0.92, 0.98)              | 1.00 (0.97, 1.04)                  | 0.99 (0.95, 1.02)                          | 1.02 (0.98, 1.06)                                                |
| 2                                   | 41,634              | 4,330         | 1.38 (1.32, 1.43)      | 1.37 (1.31, 1.42)              | 1.46 (1.40, 1.51)                  | 1.45 (1.39, 1.50)                          | 1.46 (1.40, 1.51)                                                |
| 3                                   | 18,352              | 1,514         | 1.43 (1.35, 1.51)      | 1.41 (1.33, 1.49)              | 1.56 (1.47, 1.65)                  | 1.53 (1.45, 1.62)                          | 1.57 (1.48, 1.66)                                                |

**The RECORD statement – checklist of items, extended from the STROBE statement, that should be reported in observational studies using routinely collected health data.**

|                           | Item No. | STROBE items                                                                                                                                                                                  | Location in manuscript where items are reported | RECORD items                                                                                                                                                                                                                                                                                                                                                                                                                                | Location in manuscript where items are reported |
|---------------------------|----------|-----------------------------------------------------------------------------------------------------------------------------------------------------------------------------------------------|-------------------------------------------------|---------------------------------------------------------------------------------------------------------------------------------------------------------------------------------------------------------------------------------------------------------------------------------------------------------------------------------------------------------------------------------------------------------------------------------------------|-------------------------------------------------|
| <b>Title and abstract</b> |          |                                                                                                                                                                                               |                                                 |                                                                                                                                                                                                                                                                                                                                                                                                                                             |                                                 |
|                           | 1        | (a) Indicate the study's design with a commonly used term in the title or the abstract<br>(b) Provide in the abstract an informative and balanced summary of what was done and what was found | 1, 2<br><br>2                                   | RECORD 1.1: The type of data used should be specified in the title or abstract. When possible, the name of the databases used should be included.<br><br>RECORD 1.2: If applicable, the geographic region and timeframe within which the study took place should be reported in the title or abstract.<br><br>RECORD 1.3: If linkage between databases was conducted for the study, this should be clearly stated in the title or abstract. | 1, 2<br><br>2<br><br>2                          |
| <b>Introduction</b>       |          |                                                                                                                                                                                               |                                                 |                                                                                                                                                                                                                                                                                                                                                                                                                                             |                                                 |
| Background rationale      | 2        | Explain the scientific background and rationale for the investigation being reported                                                                                                          | 5-6                                             |                                                                                                                                                                                                                                                                                                                                                                                                                                             |                                                 |
| Objectives                | 3        | State specific objectives, including any prespecified hypotheses                                                                                                                              | 6                                               |                                                                                                                                                                                                                                                                                                                                                                                                                                             |                                                 |
| <b>Methods</b>            |          |                                                                                                                                                                                               |                                                 |                                                                                                                                                                                                                                                                                                                                                                                                                                             |                                                 |
| Study Design              | 4        | Present key elements of study design early in the paper                                                                                                                                       | 6-7                                             |                                                                                                                                                                                                                                                                                                                                                                                                                                             |                                                 |
| Setting                   | 5        | Describe the setting, locations, and relevant dates, including periods of recruitment, exposure, follow-up, and data collection                                                               | 6-7                                             |                                                                                                                                                                                                                                                                                                                                                                                                                                             |                                                 |

|                              |   |                                                                                                                                                                                                                                                                                                                                                                                                                                                                                                                                                                                                                                                                                                                              |                                              |                                                                                                                                                                                                                                                                                                                                                                                                                                                                                                                                                                                                                                                                                                      |                                                                                            |
|------------------------------|---|------------------------------------------------------------------------------------------------------------------------------------------------------------------------------------------------------------------------------------------------------------------------------------------------------------------------------------------------------------------------------------------------------------------------------------------------------------------------------------------------------------------------------------------------------------------------------------------------------------------------------------------------------------------------------------------------------------------------------|----------------------------------------------|------------------------------------------------------------------------------------------------------------------------------------------------------------------------------------------------------------------------------------------------------------------------------------------------------------------------------------------------------------------------------------------------------------------------------------------------------------------------------------------------------------------------------------------------------------------------------------------------------------------------------------------------------------------------------------------------------|--------------------------------------------------------------------------------------------|
| Participants                 | 6 | <p>(a) <i>Cohort study</i> - Give the eligibility criteria, and the sources and methods of selection of participants. Describe methods of follow-up</p> <p><i>Case-control study</i> - Give the eligibility criteria, and the sources and methods of case ascertainment and control selection. Give the rationale for the choice of cases and controls</p> <p><i>Cross-sectional study</i> - Give the eligibility criteria, and the sources and methods of selection of participants</p> <p>(b) <i>Cohort study</i> - For matched studies, give matching criteria and number of exposed and unexposed</p> <p><i>Case-control study</i> - For matched studies, give matching criteria and the number of controls per case</p> | 6-7                                          | <p>RECORD 6.1: The methods of study population selection (such as codes or algorithms used to identify subjects) should be listed in detail. If this is not possible, an explanation should be provided.</p> <p>RECORD 6.2: Any validation studies of the codes or algorithms used to select the population should be referenced. If validation was conducted for this study and not published elsewhere, detailed methods and results should be provided.</p> <p>RECORD 6.3: If the study involved linkage of databases, consider use of a flow diagram or other graphical display to demonstrate the data linkage process, including the number of individuals with linked data at each stage.</p> | 6, 7, eFigure 1<br><br>6, 7, eFigure 1<br><br>6-7, protocol (BMJ open 2018; 8(2): e019698) |
| Variables                    | 7 | Clearly define all outcomes, exposures, predictors, potential confounders, and effect modifiers. Give diagnostic criteria, if applicable.                                                                                                                                                                                                                                                                                                                                                                                                                                                                                                                                                                                    | 7-8                                          | RECORD 7.1: A complete list of codes and algorithms used to classify exposures, outcomes, confounders, and effect modifiers should be provided. If these cannot be reported, an explanation should be provided.                                                                                                                                                                                                                                                                                                                                                                                                                                                                                      | 7-8                                                                                        |
| Data sources/<br>measurement | 8 | For each variable of interest, give sources of data and details of methods of assessment (measurement). Describe comparability of assessment methods if there is more than one group                                                                                                                                                                                                                                                                                                                                                                                                                                                                                                                                         | 6-7, protocol (BMJ open 2018; 8(2): e019698) |                                                                                                                                                                                                                                                                                                                                                                                                                                                                                                                                                                                                                                                                                                      |                                                                                            |

|                                                                                                                                                    |                                  |    |                                                                                                                                                                                                                                                                                                                                                                                                                                                                                                                                                                      |                        |                                                                                                                                                       |                |
|----------------------------------------------------------------------------------------------------------------------------------------------------|----------------------------------|----|----------------------------------------------------------------------------------------------------------------------------------------------------------------------------------------------------------------------------------------------------------------------------------------------------------------------------------------------------------------------------------------------------------------------------------------------------------------------------------------------------------------------------------------------------------------------|------------------------|-------------------------------------------------------------------------------------------------------------------------------------------------------|----------------|
| 1<br>2<br>3<br>4                                                                                                                                   | Bias                             | 9  | Describe any efforts to address potential sources of bias                                                                                                                                                                                                                                                                                                                                                                                                                                                                                                            | 6-7                    |                                                                                                                                                       |                |
| 5<br>6<br>7<br>8<br>9                                                                                                                              | Study size                       | 10 | Explain how the study size was arrived at                                                                                                                                                                                                                                                                                                                                                                                                                                                                                                                            | 6-7, eFigure 1         |                                                                                                                                                       |                |
| 10<br>11<br>12<br>13<br>14<br>15<br>16<br>17<br>18<br>19<br>20<br>21<br>22<br>23<br>24<br>25<br>26<br>27<br>28<br>29<br>30<br>31<br>32<br>33<br>34 | Quantitative variables           | 11 | Explain how quantitative variables were handled in the analyses. If applicable, describe which groupings were chosen, and why                                                                                                                                                                                                                                                                                                                                                                                                                                        | 7-8                    |                                                                                                                                                       |                |
| 35<br>36<br>37<br>38<br>39<br>40<br>41<br>42<br>43<br>44                                                                                           | Statistical methods              | 12 | (a) Describe all statistical methods, including those used to control for confounding<br>(b) Describe any methods used to examine subgroups and interactions<br>(c) Explain how missing data were addressed<br>(d) <i>Cohort study</i> - If applicable, explain how loss to follow-up was addressed<br><i>Case-control study</i> - If applicable, explain how matching of cases and controls was addressed<br><i>Cross-sectional study</i> - If applicable, describe analytical methods taking account of sampling strategy<br>(e) Describe any sensitivity analyses | 8<br>8<br>15<br>7<br>8 |                                                                                                                                                       |                |
| 45<br>46<br>47                                                                                                                                     | Data access and cleaning methods |    | ..                                                                                                                                                                                                                                                                                                                                                                                                                                                                                                                                                                   |                        | RECORD 12.1: Authors should describe the extent to which the investigators had access to the database population used to create the study population. | 6-7, eFigure 1 |

|                  |    |                                                                                                                                                                                                                                                                                                                                                 |                                                    |                                                                                                                                                                                                                                                                                                                    |                                              |
|------------------|----|-------------------------------------------------------------------------------------------------------------------------------------------------------------------------------------------------------------------------------------------------------------------------------------------------------------------------------------------------|----------------------------------------------------|--------------------------------------------------------------------------------------------------------------------------------------------------------------------------------------------------------------------------------------------------------------------------------------------------------------------|----------------------------------------------|
|                  |    |                                                                                                                                                                                                                                                                                                                                                 |                                                    | RECORD 12.2: Authors should provide information on the data cleaning methods used in the study.                                                                                                                                                                                                                    | 6-7, eFigure 1                               |
| Linkage          |    | ..                                                                                                                                                                                                                                                                                                                                              |                                                    | RECORD 12.3: State whether the study included person-level, institutional-level, or other data linkage across two or more databases. The methods of linkage and methods of linkage quality evaluation should be provided.                                                                                          | 6-7, protocol (BMJ open 2018; 8(2): e019698) |
| <b>Results</b>   |    |                                                                                                                                                                                                                                                                                                                                                 |                                                    |                                                                                                                                                                                                                                                                                                                    |                                              |
| Participants     | 13 | (a) Report the numbers of individuals at each stage of the study ( <i>e.g.</i> , numbers potentially eligible, examined for eligibility, confirmed eligible, included in the study, completing follow-up, and analysed)<br>(b) Give reasons for non-participation at each stage.<br>(c) Consider use of a flow diagram                          | 6-7, 9, eFigure 1<br><br>7, eFigure 1<br>eFigure 1 | RECORD 13.1: Describe in detail the selection of the persons included in the study ( <i>i.e.</i> , study population selection) including filtering based on data quality, data availability and linkage. The selection of included persons can be described in the text and/or by means of the study flow diagram. | 6-7, eFigure 1                               |
| Descriptive data | 14 | (a) Give characteristics of study participants ( <i>e.g.</i> , demographic, clinical, social) and information on exposures and potential confounders<br>(b) Indicate the number of participants with missing data for each variable of interest<br>(c) <i>Cohort study</i> - summarise follow-up time ( <i>e.g.</i> , average and total amount) | Table 1<br><br>9                                   |                                                                                                                                                                                                                                                                                                                    |                                              |
| Outcome data     | 15 | <i>Cohort study</i> - Report numbers of outcome events or summary measures over time<br><i>Case-control study</i> - Report numbers in each exposure                                                                                                                                                                                             | 11, Figure 3                                       |                                                                                                                                                                                                                                                                                                                    |                                              |



|                   |    |                                                                                                                                                                                                                                                                                                                                                                                                                 |                                             |                                                                                                                                                                                                                                                                                                          |    |
|-------------------|----|-----------------------------------------------------------------------------------------------------------------------------------------------------------------------------------------------------------------------------------------------------------------------------------------------------------------------------------------------------------------------------------------------------------------|---------------------------------------------|----------------------------------------------------------------------------------------------------------------------------------------------------------------------------------------------------------------------------------------------------------------------------------------------------------|----|
|                   |    | category, or summary measures of exposure<br><i>Cross-sectional study</i> - Report numbers of outcome events or summary measures                                                                                                                                                                                                                                                                                |                                             |                                                                                                                                                                                                                                                                                                          |    |
| Main results      | 16 | (a) Give unadjusted estimates and, if applicable, confounder-adjusted estimates and their precision (e.g., 95% confidence interval). Make clear which confounders were adjusted for and why they were included<br>(b) Report category boundaries when continuous variables were categorized<br>(c) If relevant, consider translating estimates of relative risk into absolute risk for a meaningful time period | Figure 3, eTable 4, 5, 6<br><br>9<br><br>12 |                                                                                                                                                                                                                                                                                                          |    |
| Other analyses    | 17 | Report other analyses done— e.g., analyses of subgroups and interactions, and sensitivity analyses                                                                                                                                                                                                                                                                                                              | eTable 4, 5, 6                              |                                                                                                                                                                                                                                                                                                          |    |
| <b>Discussion</b> |    |                                                                                                                                                                                                                                                                                                                                                                                                                 |                                             |                                                                                                                                                                                                                                                                                                          |    |
| Key results       | 18 | Summarise key results with reference to study objectives                                                                                                                                                                                                                                                                                                                                                        | 9-12                                        |                                                                                                                                                                                                                                                                                                          |    |
| Limitations       | 19 | Discuss limitations of the study, taking into account sources of potential bias or imprecision. Discuss both direction and magnitude of any potential bias                                                                                                                                                                                                                                                      | 15                                          | RECORD 19.1: Discuss the implications of using data that were not created or collected to answer the specific research question(s). Include discussion of misclassification bias, unmeasured confounding, missing data, and changing eligibility over time, as they pertain to the study being reported. | 15 |
| Interpretation    | 20 | Give a cautious overall interpretation of results considering objectives,                                                                                                                                                                                                                                                                                                                                       | 4, 14-16                                    |                                                                                                                                                                                                                                                                                                          |    |

|                                                           |    |                                                                                                                                                               |       |                                                                                                                                                          |      |
|-----------------------------------------------------------|----|---------------------------------------------------------------------------------------------------------------------------------------------------------------|-------|----------------------------------------------------------------------------------------------------------------------------------------------------------|------|
|                                                           |    | limitations, multiplicity of analyses, results from similar studies, and other relevant evidence                                                              |       |                                                                                                                                                          |      |
| Generalisability                                          | 21 | Discuss the generalisability (external validity) of the study results                                                                                         | 4, 16 |                                                                                                                                                          |      |
| <b>Other Information</b>                                  |    |                                                                                                                                                               |       |                                                                                                                                                          |      |
| Funding                                                   | 22 | Give the source of funding and the role of the funders for the present study and, if applicable, for the original study on which the present article is based | 17    |                                                                                                                                                          |      |
| Accessibility of protocol, raw data, and programming code |    | ..                                                                                                                                                            |       | RECORD 22.1: Authors should provide information on how to access any supplemental information such as the study protocol, raw data, or programming code. | 4, 6 |

\*Reference: Benchimol EI, Smeeth L, Guttman A, Harron K, Moher D, Petersen I, Sørensen HT, von Elm E, Langan SM, the RECORD Working Committee. The REporting of studies Conducted using Observational Routinely-collected health Data (RECORD) Statement. *PLoS Medicine* 2015; in press.

\*Checklist is protected under Creative Commons Attribution ([CC BY](https://creativecommons.org/licenses/by/4.0/)) license.
