# Supplementary material for: Multimorbidity of cardiometabolic diseases: prevalence and risk for mortality from one million Chinese adults in a longitudinal cohort study
Source: PubMed Central journal article supplement — BMJ Open. 2019 Mar 3;9(3):e024476. doi: 10.1136/bmjopen-2018-024476 (PMC6443196; doi:10.1136/bmjopen-2018-024476), 2019-03-03
Supplement: bmjopen-2018-024476supp001.pdf [file bmjopen-2018-024476supp001.pdf]

# Supplementary Material

## Multimorbidity of cardiometabolic diseases: Prevalence and Risk of Mortality from One Million Chinese Adults in a Longitudinal Cohort Study

|                                                                                                                                                                                                                             |   |
|-----------------------------------------------------------------------------------------------------------------------------------------------------------------------------------------------------------------------------|---|
| eFigure 1. Flow chart of inclusion of participants in CHERRY study. ....                                                                                                                                                    | 2 |
| eTable 1. Standardized prevalence of cardiometabolic multimorbidity at baseline (age $\geq$ 40 years). 3                                                                                                                    | 3 |
| eTable 2. Standardized prevalence of cardiometabolic multimorbidity at baseline (age $\geq$ 60 years). 4                                                                                                                    | 4 |
| eTable 3. Evolution of cardiometabolic disease status during follow-up. ....                                                                                                                                                | 5 |
| eTable 4. Age- and sex-adjusted HRs (95%) for all-cause mortality by cardiometabolic multimorbidity at baseline according to individuals' subgroups. ....                                                                   | 6 |
| eTable 5. Age- and sex-adjusted HRs (95%) for all-cause mortality by cardiometabolic multimorbidity at baseline exclude follow-up less than one year. ....                                                                  | 8 |
| eTable 6. HRs (95%) for all-cause mortality in participants with full information on cardiovascular risk factors and other characteristics ( $\geq$ 18 years, baseline vs repeat exclude diseases in 30 days of death)..... | 9 |

**eFigure 1. Flow chart of inclusion of participants in CHERRY study.**

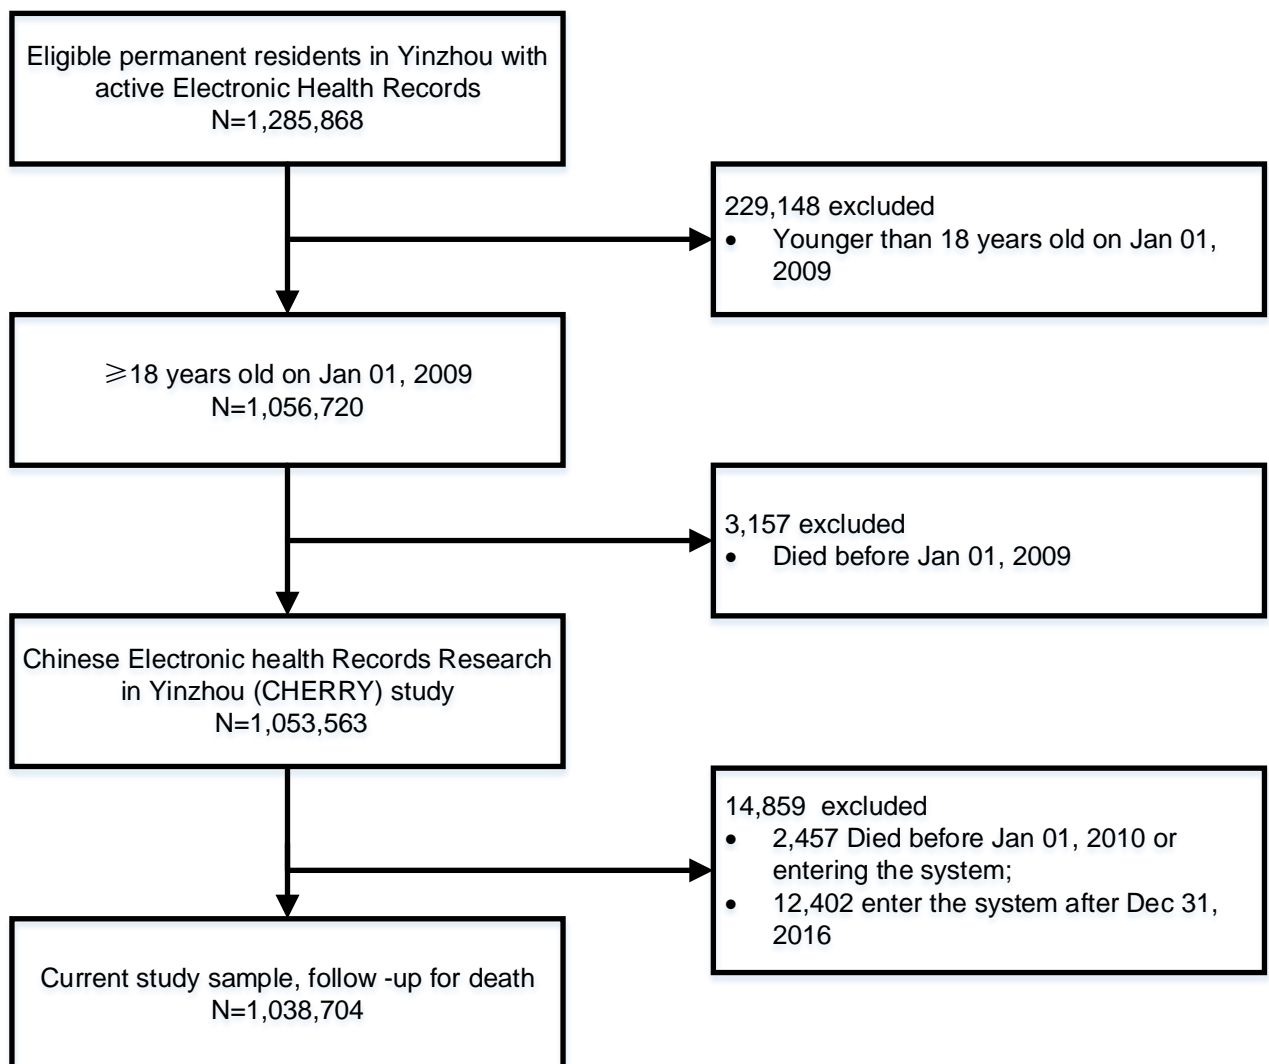

eTable 1. Standardized prevalence of cardiometabolic multimorbidity at baseline (age≥40 years).

|                       | Overall (N=545,632) |                     | Male (N=275,382) |                     | Female (N=270,250) |                     |
|-----------------------|---------------------|---------------------|------------------|---------------------|--------------------|---------------------|
|                       | No. of cases        | % (95% CI)          | No. of cases     | % (95% CI)          | No. of cases       | % (95% CI)          |
| <b>One disease</b>    | 82,589              | 16.82 (16.72-16.92) | 39,133           | 15.54 (15.40-15.68) | 43,456             | 18.11 (17.96-18.26) |
| HT                    | 67,505              | 13.81 (13.71-13.90) | 31,512           | 12.58 (12.46-12.71) | 35,993             | 15.05 (14.91-15.19) |
| DM                    | 13,041              | 2.59 (2.55-2.64)    | 6,481            | 2.50 (2.44-2.57)    | 6,560              | 2.68 (2.62-2.75)    |
| CVD                   | 2,043               | 0.42 (0.40-0.44)    | 1,140            | 0.45 (0.43-0.48)    | 903                | 0.38 (0.35-0.40)    |
| <b>Two diseases</b>   | 22,405              | 4.69 (4.65-4.75)    | 10,065           | 4.09 (4.01-4.16)    | 12,340             | 5.31 (5.22-5.40)    |
| HT+DM                 | 10,966              | 2.33 (2.28-2.36)    | 4,656            | 1.90 (1.85-1.96)    | 6,310              | 2.76 (2.69-2.82)    |
| HT+CVD                | 11,186              | 2.31 (2.27-2.36)    | 5,268            | 2.12 (2.07-2.18)    | 5,918              | 2.50 (2.44-2.57)    |
| DM+CVD                | 253                 | 0.05 (0.05-0.06)    | 141              | 0.06 (0.05-0.07)    | 112                | 0.05 (0.04-0.06)    |
| <b>Three diseases</b> | 2,185               | 0.47 (0.45-0.49)    | 828              | 0.34 (0.32-0.37)    | 1,357              | 0.60 (0.57-0.64)    |

HT, hypertension; DM, diabetes mellitus; CVD, cardiovascular disease.

**eTable 2. Standardized prevalence of cardiometabolic multimorbidity at baseline (age≥60 years).**

|                       | Overall (N=61,339) |                     | Male (N=28,431) |                     | Female (N=32,908) |                     |
|-----------------------|--------------------|---------------------|-----------------|---------------------|-------------------|---------------------|
|                       | No. of cases       | % (95% CI)          | No. of cases    | % (95% CI)          | No. of cases      | % (95% CI)          |
| <b>One disease</b>    | 45,083             | 31.90 (31.65-32.14) | 21,351          | 30.06 (29.72-30.40) | 23,732            | 33.66 (33.31-34.01) |
| HT                    | 37,777             | 26.77 (26.54-27.00) | 17,807          | 25.12 (24.80-25.44) | 19,970            | 28.36 (28.02-28.70) |
| DM                    | 5,833              | 4.12 (4.02-4.23)    | 2,733           | 3.84 (3.70-3.98)    | 3,100             | 4.39 (4.24-4.54)    |
| CVD                   | 1,473              | 1.00 (0.95-1.06)    | 811             | 1.10 (1.03-1.18)    | 662               | 0.91 (0.84-0.98)    |
| <b>Two diseases</b>   | 14,597             | 10.41 (10.25-10.57) | 6,448           | 9.11 (8.90-9.33)    | 8,149             | 11.65 (11.41-11.90) |
| HT+DM                 | 7,398              | 5.32 (5.20-5.44)    | 3,057           | 4.33 (4.18-4.49)    | 4,341             | 6.26 (6.08-6.45)    |
| HT+CVD                | 7,005              | 4.96 (4.84-5.07)    | 3,288           | 4.64 (4.48-4.79)    | 3,717             | 5.27 (5.10-5.44)    |
| DM+CVD                | 194                | 0.13 (0.11-0.15)    | 103             | 0.14 (0.11-0.17)    | 91                | 0.12 (0.10-0.15)    |
| <b>Three diseases</b> | 1,659              | 1.20 (1.14-1.26)    | 632             | 0.89 (0.82-0.96)    | 1,027             | 1.49 (1.40-1.58)    |

HT, hypertension; DM, diabetes mellitus; CVD, cardiovascular disease.

eTable 3. Evolution of cardiometabolic disease status during follow-up.

| Number of disorders<br>at baseline | Number of disorders at last visit |                     |                    |                   |                  |                   |                   |                   |                  |                   | Total              |
|------------------------------------|-----------------------------------|---------------------|--------------------|-------------------|------------------|-------------------|-------------------|-------------------|------------------|-------------------|--------------------|
|                                    | None                              | One disease         | HT                 | DM                | CVD              | Two diseases      | HT+DM             | HT+CVD            | DM+CVD           | Three diseases    |                    |
| <b>None</b>                        | 854,643<br>(92.1%)                | 60,668<br>(6.5%)    | 47,903<br>(5.2%)   | 8,388<br>(0.9%)   | 4,377<br>(0.5%)  | 9,931<br>(1.1%)   | 4,322<br>(0.5%)   | 2,798<br>(0.3%)   | 2,811<br>(0.30%) | 2,704<br>(0.3%)   | 927,946<br>(89.3%) |
| <b>One disease</b>                 |                                   | 61,643<br>(71.9%)   |                    |                   |                  | 18,266<br>(21.3%) |                   |                   |                  | 5,775<br>(6.7%)   | 85,684<br>(8.2%)   |
| HT                                 |                                   |                     | 53,093<br>(76.5%)  |                   |                  |                   | 3,602<br>(5.2%)   | 9,279<br>(13.4%)  |                  | 3,432<br>(4.9%)   | 69,406<br>(6.7%)   |
| DM                                 |                                   |                     |                    | 6,962<br>(49.3%)  |                  |                   | 1,779<br>(12.6%)  |                   | 3,121<br>(22.1%) | 2,265<br>(16.0%)  | 14,127<br>(1.4%)   |
| CVD                                |                                   |                     |                    |                   | 1,588<br>(73.8%) |                   |                   | 437<br>(20.3%)    | 48<br>(2.2%)     | 78<br>(3.6%)      | 2,151<br>(0.2%)    |
| <b>Two diseases</b>                |                                   |                     |                    |                   |                  | 15,006<br>(65.6%) |                   |                   |                  | 7,865<br>(34.4%)  | 22,871<br>(2.2%)   |
| HT+DM                              |                                   |                     |                    |                   |                  |                   | 4,539<br>(41.0%)  |                   |                  | 6,534<br>(59.0%)  | 11,073<br>(1.1%)   |
| HT+CVD                             |                                   |                     |                    |                   |                  |                   |                   | 10,292<br>(89.2%) |                  | 1,248<br>(10.8%)  | 11,540<br>(1.1%)   |
| DM+CVD                             |                                   |                     |                    |                   |                  |                   |                   |                   | 175<br>(67.8%)   | 83<br>(32.2%)     | 258<br>(0.0%)      |
| <b>Three diseases</b>              |                                   |                     |                    |                   |                  |                   |                   |                   |                  | 2,203<br>(0.2%)   | 2,203<br>(0.2%)    |
| <b>Total</b>                       | 854,643<br>(82.28%)               | 122,311<br>(11.78%) | 100,996<br>(9.72%) | 15,350<br>(1.48%) | 5,965<br>(0.57%) | 43,203<br>(4.16%) | 14,242<br>(1.37%) | 22,806<br>(2.20%) | 6,155<br>(0.59%) | 18,547<br>(1.79%) | 1,038,704          |

HT, hypertension; DM, diabetes mellitus; CVD, cardiovascular disease.

**eTable 4. Age- and sex-adjusted HRs (95%) for all-cause mortality by cardiometabolic multimorbidity at baseline according to individuals' subgroups.**

| Subgroup                      |                                           | Number of disorders    | n (total) | n (death) | HR (95% CI)      |
|-------------------------------|-------------------------------------------|------------------------|-----------|-----------|------------------|
| <b>Gender</b>                 | <b>Men</b>                                | 0                      | 452,452   | 7,390     | 1                |
|                               |                                           | 1                      | 40,883    | 3,481     | 1.38 (1.32-1.43) |
|                               |                                           | 2                      | 10,349    | 1,316     | 1.68 (1.58-1.78) |
|                               |                                           | 3                      | 841       | 155       | 2.01 (1.71-2.36) |
|                               | <b>Women</b>                              | 0                      | 475,494   | 5,641     | 1                |
|                               |                                           | 1                      | 44,801    | 3,176     | 1.39 (1.33-1.45) |
|                               |                                           | 2                      | 12,522    | 1,363     | 1.78 (1.67-1.88) |
|                               |                                           | 3                      | 1,362     | 228       | 2.44 (2.14-2.78) |
| <b>Age groups</b>             | <b>&lt;40 years</b>                       | 0                      | 489,493   | 391       | 1                |
|                               |                                           | 1                      | 3,095     | 22        | 4.74 (3.06-7.33) |
|                               |                                           | ≥2                     | 484       | 2         | 1.91 (0.47-7.67) |
|                               | <b>40-59 years</b>                        | 0                      | 356,879   | 2,856     | 1                |
|                               |                                           | 1                      | 37,506    | 538       | 1.10 (1.00-1.21) |
|                               |                                           | 2                      | 7,808     | 157       | 1.32 (1.13-1.56) |
|                               |                                           | 3                      | 526       | 16        | 1.87 (1.14-3.05) |
|                               | <b>≥60 years</b>                          | 0                      | 81,574    | 9,784     | 1                |
|                               |                                           | 1                      | 45,083    | 6,097     | 1.22 (1.18-1.26) |
|                               |                                           | 2                      | 14,597    | 2,520     | 1.50 (1.44-1.57) |
|                               |                                           | 3                      | 1,659     | 367       | 1.91 (1.72-2.12) |
|                               | <b>BMI (kg/m2 Asian-specific cutoffs)</b> | <b>&lt;23 (Normal)</b> | 0         | 520,434   | 6,971            |
| 1                             |                                           |                        | 33,112    | 3,407     | 1.18 (1.13-1.23) |
| 2                             |                                           |                        | 7,879     | 1,223     | 1.47 (1.38-1.56) |
| 3                             |                                           |                        | 681       | 141       | 1.79 (1.51-2.11) |
| <b>23-&lt;25 (Overweight)</b> |                                           | 0                      | 187,405   | 2,617     | 1                |
|                               |                                           | 1                      | 23,757    | 1,490     | 0.98 (0.92-1.04) |
|                               |                                           | 2                      | 6,294     | 588       | 1.16 (1.06-1.27) |
|                               |                                           | 3                      | 563       | 94        | 1.61 (1.31-1.98) |
| <b>≥25 (Obese)</b>            |                                           | 0                      | 89,870    | 1,430     | 1                |

|                               |                                   |   |         |        |                  |
|-------------------------------|-----------------------------------|---|---------|--------|------------------|
|                               |                                   | 1 | 26,650  | 1,266  | 0.98 (0.90-1.05) |
|                               |                                   | 2 | 8,404   | 705    | 1.32 (1.21-1.45) |
|                               |                                   | 3 | 938     | 132    | 1.85 (1.55-2.21) |
| <b>BMI (kg/m<sup>2</sup>)</b> | <b>&lt;25 (Normal)</b>            | 0 | 707,839 | 9,588  | 1                |
|                               |                                   | 1 | 56,869  | 4,897  | 1.10 (1.07-1.14) |
|                               |                                   | 2 | 14,173  | 1,811  | 1.34 (1.28-1.41) |
|                               |                                   | 3 | 1,244   | 235    | 1.71 (1.50-1.94) |
|                               | <b>25-&lt;30<br/>(Overweight)</b> | 0 | 84,326  | 1,325  | 1                |
|                               |                                   | 1 | 23,991  | 1,132  | 0.97 (0.90-1.05) |
|                               |                                   | 2 | 7,459   | 612    | 1.30 (1.18-1.43) |
|                               |                                   | 3 | 804     | 115    | 1.86 (1.53-2.25) |
|                               | <b>≥30 (Obese)</b>                | 0 | 5,544   | 105    | 1                |
|                               |                                   | 1 | 2,659   | 134    | 1.01 (0.78-1.31) |
|                               |                                   | 2 | 945     | 93     | 1.55 (1.17-2.06) |
|                               |                                   | 3 | 134     | 17     | 1.79 (1.07-3.00) |
| <b>Smoking status</b>         | <b>Current smoker</b>             | 0 | 162,325 | 1,762  | 1                |
|                               |                                   | 1 | 9,186   | 615    | 1.27 (1.15-1.39) |
|                               |                                   | 2 | 2,411   | 236    | 1.50 (1.31-1.72) |
|                               |                                   | 3 | 162     | 30     | 2.81 (1.96-4.04) |
|                               | <b>Non-current smoker</b>         | 0 | 650,393 | 10,132 | 1                |
|                               |                                   | 1 | 73,932  | 5,914  | 1.16 (1.12-1.20) |
|                               |                                   | 2 | 20,400  | 2,433  | 1.45 (1.39-1.52) |
|                               |                                   | 3 | 2,040   | 352    | 1.83 (1.64-2.03) |
| <b>Region</b>                 | <b>Rural</b>                      | 0 | 638,725 | 10,421 | 1                |
|                               |                                   | 1 | 53,347  | 5,343  | 1.39 (1.35-1.44) |
|                               |                                   | 2 | 15,043  | 2,015  | 1.57 (1.50-1.65) |
|                               |                                   | 3 | 1,527   | 295    | 2.01 (1.79-2.25) |
|                               | <b>Urban</b>                      | 0 | 279,407 | 2,521  | 1                |
|                               |                                   | 1 | 29,368  | 1,267  | 1.30 (1.21-1.39) |
|                               |                                   | 2 | 7,468   | 628    | 2.06 (1.89-2.25) |
|                               |                                   | 3 | 657     | 84     | 2.54 (2.04-3.15) |

**eTable 5. Age- and sex-adjusted HRs (95%) for all-cause mortality by cardiometabolic multimorbidity at baseline exclude follow-up less than one year.**

| <b>Diseases at baseline</b> | <b>No. of Participants</b> | <b>No. of deaths</b> | <b>HR (95% CI)</b> |
|-----------------------------|----------------------------|----------------------|--------------------|
| <b>None</b>                 | 916,681                    | 10,941               | 1                  |
| <b>One diseases</b>         | 82,959                     | 5,945                | 1.46 (1.42-1.51)   |
| HT                          | 67,560                     | 4,767                | 1.35 (1.31-1.40)   |
| DM                          | 13,443                     | 729                  | 1.83 (1.70-1.97)   |
| CVD                         | 1,956                      | 449                  | 3.10 (2.82-3.40)   |
| <b>Two diseases</b>         | 22,393                     | 2,394                | 1.82 (1.74-1.90)   |
| HT+DM                       | 10,848                     | 1,024                | 1.75 (1.64-1.87)   |
| HT+CVD                      | 11,317                     | 1,331                | 1.85 (1.74-1.95)   |
| DM+CVD                      | 228                        | 39                   | 3.07 (2.24-4.20)   |
| <b>Three diseases</b>       | 2,142                      | 343                  | 2.36 (2.12-2.63)   |

HT, hypertension; DM, diabetes mellitus; CVD, cardiovascular disease



**eTable 6. HRs (95%) for all-cause mortality in participants with full information on cardiovascular risk factors and other characteristics (≥18 years, baseline vs repeat exclude diseases in 30 days of death).**

|                                     | No. of Participants | No. of Deaths | Model 1<br>Age and Sex | Model 2<br>Age, Sex and BMI | Model 3<br>Age, Sex and Smoking | Model 4<br>Age, Sex, Smoking and BMI | Model 5<br>Age, Sex, Smoking, BMI, Education and Region |
|-------------------------------------|---------------------|---------------|------------------------|-----------------------------|---------------------------------|--------------------------------------|---------------------------------------------------------|
| <b>Comorbidity at baseline</b>      |                     |               |                        |                             |                                 |                                      |                                                         |
| 0                                   | 687,478             | 10,607        | 1                      | 1                           | 1                               | 1                                    | 1                                                       |
| 1                                   | 77,125              | 6,019         | 1.04 (1.01, 1.07)      | 1.03 (0.99, 1.06)           | 1.08 (1.04, 1.11)               | 1.06 (1.03, 1.10)                    | 1.09 (1.06, 1.13)                                       |
| 2                                   | 21,945              | 2,470         | 1.26 (1.21, 1.32)      | 1.25 (1.19, 1.31)           | 1.33 (1.28, 1.40)               | 1.32 (1.26, 1.38)                    | 1.35 (1.29, 1.41)                                       |
| 3                                   | 2,155               | 363           | 1.64 (1.48, 1.82)      | 1.63 (1.47, 1.81)           | 1.77 (1.60, 1.97)               | 1.76 (1.58, 1.95)                    | 1.79 (1.61, 1.98)                                       |
| <b>Comorbidity during follow-up</b> |                     |               |                        |                             |                                 |                                      |                                                         |
| 0                                   | 617,490             | 7,743         | 1                      | 1                           | 1                               | 1                                    | 1                                                       |
| 1                                   | 111,227             | 5,872         | 0.96 (0.93, 1.00)      | 0.95 (0.92, 0.98)           | 1.00 (0.97, 1.04)               | 0.99 (0.95, 1.02)                    | 1.02 (0.98, 1.06)                                       |
| 2                                   | 41,634              | 4,330         | 1.38 (1.32, 1.43)      | 1.37 (1.31, 1.42)           | 1.46 (1.40, 1.51)               | 1.45 (1.39, 1.50)                    | 1.46 (1.40, 1.51)                                       |
| 3                                   | 18,352              | 1,514         | 1.43 (1.35, 1.51)      | 1.41 (1.33, 1.49)           | 1.56 (1.47, 1.65)               | 1.53 (1.45, 1.62)                    | 1.57 (1.48, 1.66)                                       |
